# Supplementary material for: The differentiation and integration of the hippocampal dorsoventral axis are controlled by two nuclear receptor genes
Source: eLife journal article supplement (doi:10.7554/elife.86940), 2023-05-10
Supplement: fig1-data6 [file 20220825WB_CI&CII.xlsx]

## Sheet: Sheet1
		dHPC1	vHPC1	dHPC2	vHPC2	dHPC3	vHPC3
	CI	18559	13095	16983	12239	10600	8999
	CII	12050	22311	9846	22361	11290	18252
	GAPDH	40385	47021	42457	41450	32329	33413
	CI/GAPDH	0.459552	0.278493	0.400005	0.295271	0.327879	0.269326
	CII/GAPDH	0.298378	0.47449	0.231905	0.539469	0.349222	0.546254
