# Supplementary material for: The differentiation and integration of the hippocampal dorsoventral axis are controlled by two nuclear receptor genes
Source: eLife journal article supplement (doi:10.7554/elife.86940), 2023-05-10
Supplement: fig2-figsupp1-data1 [file Results Of Morris Water Maze NEW.xls]

## Sheet: Results Of Morris Water Maze
DAY1-DAY6 (Trial)
	DAY1				DAY2				DAY3				DAY4				DAY5				DAY6
NO	Latency(s)				Latency(s)				Latency(s)				Latency(s)				Latency(s)				Latency(s)
	Trial 1-1	Trial 1-2	Trial 1-3	Trial 1-4	Trial 2-1	Trial 2-2	Trial 2-3	Trial 2-4	Trial 3-1	Trial 3-2	Trial 3-3	Trial 3-4	Trial 4-1	Trial 4-2	Trial 4-3	Trial 4-4	Trial 5-1	Trial 5-2	Trial 5-3	Trial 5-4	Trial 6-1	Trial 6-2	Trial 6-3	Trial 6-4
2066-MUT	60	60	46.85	60	60	60	1.75	60	48.78	10.22	57	4.78	60	60	60	18.75	60	21.58	28.35	60	5.97	10.1	60	40.72
2068-MUT	60	60	33.19	60	15.13	14.06	3.06	15.69	42.28	7.81	17.78	3.16	60	46.53	31.47	11.37	26	37.47	39.54	4.22	13.53	20.59	28	13.62
2067-CON	60	60	60	4.75	60	60	60	60	51.1	46.09	29.25	1.91	60	33.94	15.03	4.16	32.41	20.78	23.97	1.25	12.12	14.47	7.12	8.07
2012-CON	60	60	60	3.78	18.97	3.84	10	12.91	3.91	5.06	13.35	8.57	4.25	4.22	3.22	16.44	5.35	3.72	3.16	5.5	4.56	4.56	9.28	2.53
2010-CON	60	59.16	41.28	7.21	4.59	8.31	11.63	4.56	11.94	3.72	3.1	2.06	4.25	5.47	4.53	7.27	12.06	3.72	5.72	2.41	3.91	7.63	4.56	4.94
2009-MUT	60	60	4.31	2.16	60	39.53	3.38	9.34	3.16	60	60	56.65	16.34	41.65	60	2.56	24.06	44.62	3.81	5.19	60	22.72	3.93	31.97
2011-CON	60	10.03	5.18	4.07	7.66	3.56	5.25	9.31	8.38	18.91	8.16	31.72	7.81	6.84	9.53	1.66	4.81	4.47	3.4	2.03	3.28	9.91	3.5	3.75
2138-CON	60	43.25	50	5.28	6.78	4.03	4.28	3.34	2.91	3.5	2.72	3.22	3.85	5.79	5.88	2	16.81	3.31	14.81	7.53	2.5	3.15	4.85	2.56
2137-CON	8.82	9.5	15.62	5.53	60	20.06	10.6	18	5.22	4.75	6.21	2.69	4.15	4.1	2.47	1.62	7.16	3.81	3.59	3.82	3.25	4.97	10.47	2.19
2140-CON	60	12.16	14.1	3.1	27.75	8.25	2	3.75	3.03	5.66	3.44	1.94	6.87	5.66	9.43	2.09	3.69	5.44	3.03	3.22	3.12	2.94	2.47	8.44
2141-MUT	60	60	3.84	3.06	8.13	11.12	4.82	35.32	4.66	27.19	7.37	6.84	18.22	4.12	16	1.5	16.38	6.44	3.35	51.28	5.18	3.97	5.19	3.34
2059-CON	60	22.31	31.63	11.56	43.56	4.19	22.03	10.41	15.97	5.13	14.13	1.43	10	9.37	4.62	24.78	13.62	5.84	5.22	4.06	4.03	7.06	3.09	6.88
2063-MUT	36.16	60	6.97	1.96	24.15	14.9	8.03	12.43	15.93	21.22	60	6.96	7.82	44.44	43.53	56.72	9.19	6.38	5.81	19.09	3.5	13.31	7.28	3.56
2057-CON	60	50.62	57.75	9.6	38.13	21.57	9.81	16.65	18.94	12.41	18.97	3.31	12.62	30.97	6.41	3.97	23.47	5.5	7.28	1.13	8.4	20.47	5.78	5.65
2061-CON	28.22	60	16	2.31	5.65	11.44	1.75	15.07	25.03	19.43	2.28	12.94	19.69	6.72	6.68	12.25	14.88	3.35	6.94	3.78	3.63	5.21	6.97	2.31
2193-MUT	60	60	53.31	21.41	60	16.75	5.47	60	60	6.37	38.34	2.78	14.91	60	14.25	13.93	25.35	19.32	5.54	2.46	51.5	60	11.88	60
2195-CON	60	60	60	60	60	59.25	2.47	6.04	7.22	7.91	10.12	9.84	9.47	13.78	7.54	8.1	13.78	7.47	7.44	7	6.19	11.57	2.25	6.13
2197-CON	60	17.88	4.18	1.81	13.44	3.44	4.97	14.91	3.78	23.28	6.38	8.41	4.28	5.85	4.66	2.22	3.65	1.75	2.85	2.69	2.59	3.66	2.81	3.97
2194-CON	60	46.44	13.78	10.97	7.63	9.34	11.34	9.16	5.28	8.6	12.16	3.03	6.41	7.28	5.69	7.13	10.22	3.16	7.44	4.63	10.72	6.94	19.41	2.44
2147-CON	60	60	60	22.06	6.4	6.06	5.56	16.03	23.54	13	8.56	3.81	23.66	6.29	4.47	5.4	13.44	5.34	6.78	4.69	8.81	7.25	11.1	10.88
2146-MUT	60	60	60	60	60	60	60	60	5.03	60	60	2.53	60	60	60	7.6	60	60	60	38.5	33.81	43.56	14.87	3.1
2257-CON	60	30	35.63	16.69	46.1	9.69	1.62	4.12	5.44	12.18	4	2.97	4.81	3.47	5.59	0.94	6.41	15.12	5.25	1.59	3.63	6.5	4.19	2.34
2259-CON	41.43	60	9	3.12	7.28	6.69	7.63	4.19	11.84	24.72	7.5	20.82	8.88	6.4	10.28	1.63	10.78	4.72	4.16	8	3.25	5.81	9.66	6.69
2256-MUT	60	60	60	60	54.68	60	60	35.06	20.06	60	16.38	20.82	14.91	19.57	42.31	21.93	60	27.44	60	60	60	13.41	9.66	60
DAY7(Probe Trial）
NO	耳标号	Time in tne target quadrant(s）			The percentage of target quadrant
1	2066-MUT	18.52			30.8667
2	2067-CON	33.87			56.45
3	2068-MUT	29.61			49.35
4	2009-MUT	21.11			35.1833
5	2011-CON	32			53.3333
6	2012-CON	37.81			63.0167
7	2010-CON	36.24			60.4
8	2141-MUT	22.33			37.2167
9	2137-CON	30.72			51.2
10	2140-CON	28.47			47.45
11	2138-CON	32.36			53.9333
12	2197-CON	39.27			65.45
13	2194-CON	21.76			36.2667
14	2193-MUT	26.94			44.9
15	2195-CON	23.25			38.75
16	2063-MUT	29.69			49.4833
17	2059-CON	39.83			66.3833
18	2057-CON	14.75			24.5833
19	2061-CON	41.35			68.9167
20	2147-CON	32.22			53.7
21	2146-MUT	19.4			32.3333
22	2257-CON	31.06			51.7667
23	2259-CON	37.47			62.45
24	2256-MUT	18.97			31.6167

## Sheet: analyzed
DAY1-DAY6 (Trial)
	DAY1				DAY2				DAY3				DAY4				DAY5				DAY6
NO	Latency(s)				Latency(s)				Latency(s)				Latency(s)				Latency(s)				Latency(s)
	Trial 1-1	Trial 1-2	Trial 1-3	Trial 1-4	Trial 2-1	Trial 2-2	Trial 2-3	Trial 2-4	Trial 3-1	Trial 3-2	Trial 3-3	Trial 3-4	Trial 4-1	Trial 4-2	Trial 4-3	Trial 4-4	Trial 5-1	Trial 5-2	Trial 5-3	Trial 5-4	Trial 6-1	Trial 6-2	Trial 6-3	Trial 6-4
2067-CON	60	60	60	4.75	60	60	60	60	51.1	46.09	29.25	1.91	60	33.94	15.03	4.16	32.41	20.78	23.97	1.25	12.12	14.47	7.12	8.07
2012-CON	60	60	60	3.78	18.97	3.84	10	12.91	3.91	5.06	13.35	8.57	4.25	4.22	3.22	16.44	5.35	3.72	3.16	5.5	4.56	4.56	9.28	2.53
2010-CON	60	59.16	41.28	7.21	4.59	8.31	11.63	4.56	11.94	3.72	3.1	2.06	4.25	5.47	4.53	7.27	12.06	3.72	5.72	2.41	3.91	7.63	4.56	4.94
2011-CON	60	10.03	5.18	4.07	7.66	3.56	5.25	9.31	8.38	18.91	8.16	31.72	7.81	6.84	9.53	1.66	4.81	4.47	3.4	2.03	3.28	9.91	3.5	3.75
2138-CON	60	43.25	50	5.28	6.78	4.03	4.28	3.34	2.91	3.5	2.72	3.22	3.85	5.79	5.88	2	16.81	3.31	14.81	7.53	2.5	3.15	4.85	2.56
2137-CON	8.82	9.5	15.62	5.53	60	20.06	10.6	18	5.22	4.75	6.21	2.69	4.15	4.1	2.47	1.62	7.16	3.81	3.59	3.82	3.25	4.97	10.47	2.19
2140-CON	60	12.16	14.1	3.1	27.75	8.25	2	3.75	3.03	5.66	3.44	1.94	6.87	5.66	9.43	2.09	3.69	5.44	3.03	3.22	3.12	2.94	2.47	8.44
2059-CON	60	22.31	31.63	11.56	43.56	4.19	22.03	10.41	15.97	5.13	14.13	1.43	10	9.37	4.62	24.78	13.62	5.84	5.22	4.06	4.03	7.06	3.09	6.88
2057-CON	60	50.62	57.75	9.6	38.13	21.57	9.81	16.65	18.94	12.41	18.97	3.31	12.62	30.97	6.41	3.97	23.47	5.5	7.28	1.13	8.4	20.47	5.78	5.65
2061-CON	28.22	60	16	2.31	5.65	11.44	1.75	15.07	25.03	19.43	2.28	12.94	19.69	6.72	6.68	12.25	14.88	3.35	6.94	3.78	3.63	5.21	6.97	2.31
2195-CON	60	60	60	60	60	59.25	2.47	6.04	7.22	7.91	10.12	9.84	9.47	13.78	7.54	8.1	13.78	7.47	7.44	7	6.19	11.57	2.25	6.13
2197-CON	60	17.88	4.18	1.81	13.44	3.44	4.97	14.91	3.78	23.28	6.38	8.41	4.28	5.85	4.66	2.22	3.65	1.75	2.85	2.69	2.59	3.66	2.81	3.97
2194-CON	60	46.44	13.78	10.97	7.63	9.34	11.34	9.16	5.28	8.6	12.16	3.03	6.41	7.28	5.69	7.13	10.22	3.16	7.44	4.63	10.72	6.94	19.41	2.44
2147-CON	60	60	60	22.06	6.4	6.06	5.56	16.03	23.54	13	8.56	3.81	23.66	6.29	4.47	5.4	13.44	5.34	6.78	4.69	8.81	7.25	11.1	10.88
2257-CON	60	30	35.63	16.69	46.1	9.69	1.62	4.12	5.44	12.18	4	2.97	4.81	3.47	5.59	0.94	6.41	15.12	5.25	1.59	3.63	6.5	4.19	2.34
2259-CON	41.43	60	9	3.12	7.28	6.69	7.63	4.19	11.84	24.72	7.5	20.82	8.88	6.4	10.28	1.63	10.78	4.72	4.16	8	3.25	5.81	9.66	6.69
2066-MUT	60	60	46.85	60	60	60	1.75	60	48.78	10.22	57	4.78	60	60	60	18.75	60	21.58	28.35	60	5.97	10.1	60	40.72
2068-MUT	60	60	33.19	60	15.13	14.06	3.06	15.69	42.28	7.81	17.78	3.16	60	46.53	31.47	11.37	26	37.47	39.54	4.22	13.53	20.59	28	13.62
2009-MUT	60	60	4.31	2.16	60	39.53	3.38	9.34	3.16	60	60	56.65	16.34	41.65	60	2.56	24.06	44.62	3.81	5.19	60	22.72	3.93	31.97
2141-MUT	60	60	3.84	3.06	8.13	11.12	4.82	35.32	4.66	27.19	7.37	6.84	18.22	4.12	16	1.5	16.38	6.44	3.35	51.28	5.18	3.97	5.19	3.34
2063-MUT	36.16	60	6.97	1.96	24.15	14.9	8.03	12.43	15.93	21.22	60	6.96	7.82	44.44	43.53	56.72	9.19	6.38	5.81	19.09	3.5	13.31	7.28	3.56
2193-MUT	60	60	53.31	21.41	60	16.75	5.47	60	60	6.37	38.34	2.78	14.91	60	14.25	13.93	25.35	19.32	5.54	2.46	51.5	60	11.88	60
2146-MUT	60	60	60	60	60	60	60	60	5.03	60	60	2.53	60	60	60	7.6	60	60	60	38.5	33.81	43.56	14.87	3.1
2256-MUT	60	60	60	60	54.68	60	60	35.06	20.06	60	16.38	20.82	14.91	19.57	42.31	21.93	60	27.44	60	60	60	13.41	9.66	60
	Time in the target quadrant (s)			The percentage of time in target quadrant						Day1	Day2	Day3	Day4	Day5	Day6
CON	32.0269			53.3781					CON	34.7783	16.1414	10.7325	8.66938	7.25641	6.14641
MUT	23.3212			38.8687					MUT	46.0381	32.9	27.3156	32.8259	29.7303	24.3209
SEM-CON	1.80378			3.0063					SEM-CON	2.98195	2.23315	1.26141	1.15243	0.758025	0.483637
SEM-MUT	1.67139			2.78565					SEM-MUT	3.98837	4.25067	4.10815	3.87194	3.86506	3.79295
SD-CON	7.21511			12.0252					SD-CON	23.8556	17.8652	10.0913	9.21946	6.0642	3.8691
SD-MUT	4.7274			7.87901					SD-MUT	22.5617	24.0454	23.2392	21.903	21.8641	21.4562
SQRT-C	4			4					SQRT-C	8	8	8	8	8	8
SQRT-M	2.82843			2.82843					SQRT-M	5.65685	5.65685	5.65685	5.65685	5.65685	5.65685
t-test	0.00547326			0.00547326					t-test	0.0288905	0.000216753	4.32353e-06	2.12213e-11	1.43319e-11	2.43245e-09
DAY7(Probe Trial）
NO	耳标号	Time in tne target quadrant(s）			The percentage of target quadrant
2	2067-CON	33.87			56.45
5	2011-CON	32			53.3333
6	2012-CON	37.81			63.0167
7	2010-CON	36.24			60.4
9	2137-CON	30.72			51.2
10	2140-CON	28.47			47.45
11	2138-CON	32.36			53.9333
12	2197-CON	39.27			65.45
13	2194-CON	21.76			36.2667
15	2195-CON	23.25			38.75
17	2059-CON	39.83			66.3833
18	2057-CON	14.75			24.5833
19	2061-CON	41.35			68.9167
20	2147-CON	32.22			53.7
22	2257-CON	31.06			51.7667
23	2259-CON	37.47			62.45
1	2066-MUT	18.52			30.8667
3	2068-MUT	29.61			49.35
4	2009-MUT	21.11			35.1833
8	2141-MUT	22.33			37.2167
14	2193-MUT	26.94			44.9
16	2063-MUT	29.69			49.4833
21	2146-MUT	19.4			32.3333
24	2256-MUT	18.97			31.6167

## Sheet: modified
DAY1-DAY6 (Trial)
	DAY1				DAY2				DAY3				DAY4				DAY5				DAY6
NO	Latency(s)				Latency(s)				Latency(s)				Latency(s)				Latency(s)				Latency(s)
	Trial 1-1	Trial 1-2	Trial 1-3	Trial 1-4	Trial 2-1	Trial 2-2	Trial 2-3	Trial 2-4	Trial 3-1	Trial 3-2	Trial 3-3	Trial 3-4	Trial 4-1	Trial 4-2	Trial 4-3	Trial 4-4	Trial 5-1	Trial 5-2	Trial 5-3	Trial 5-4	Trial 6-1	Trial 6-2	Trial 6-3	Trial 6-4
2067-CON	60	60	60	4.75	60	60	60	60	51.1	46.09	29.25	1.91	60	33.94	15.03	4.16	32.41	20.78	23.97	1.25	12.12	14.47	7.12	8.07
2138-CON	60	43.25	50	5.28	6.78	4.03	4.28	3.34	2.91	3.5	2.72	3.22	3.85	5.79	5.88	2	16.81	3.31	14.81	7.53	2.5	3.15	4.85	2.56
2137-CON	8.82	9.5	15.62	5.53	60	20.06	10.6	18	5.22	4.75	6.21	2.69	4.15	4.1	2.47	1.62	7.16	3.81	3.59	3.82	3.25	4.97	10.47	2.19
2140-CON	60	12.16	14.1	3.1	27.75	8.25	2	3.75	3.03	5.66	3.44	1.94	6.87	5.66	9.43	2.09	3.69	5.44	3.03	3.22	3.12	2.94	2.47	8.44
2059-CON	60	22.31	31.63	11.56	43.56	4.19	22.03	10.41	15.97	5.13	14.13	1.43	10	9.37	4.62	24.78	13.62	5.84	5.22	4.06	4.03	7.06	3.09	6.88
2061-CON	28.22	60	16	2.31	5.65	11.44	1.75	15.07	25.03	19.43	2.28	12.94	19.69	6.72	6.68	12.25	14.88	3.35	6.94	3.78	3.63	5.21	6.97	2.31
2195-CON	60	60	60	60	60	59.25	2.47	6.04	7.22	7.91	10.12	9.84	9.47	13.78	7.54	8.1	13.78	7.47	7.44	7	6.19	11.57	2.25	6.13
2197-CON	60	17.88	4.18	1.81	13.44	3.44	4.97	14.91	3.78	23.28	6.38	8.41	4.28	5.85	4.66	2.22	3.65	1.75	2.85	2.69	2.59	3.66	2.81	3.97
2194-CON	60	46.44	13.78	10.97	7.63	9.34	11.34	9.16	5.28	8.6	12.16	3.03	6.41	7.28	5.69	7.13	10.22	3.16	7.44	4.63	10.72	6.94	19.41	2.44
2147-CON	60	60	60	22.06	6.4	6.06	5.56	16.03	23.54	13	8.56	3.81	23.66	6.29	4.47	5.4	13.44	5.34	6.78	4.69	8.81	7.25	11.1	10.88
2257-CON	60	30	35.63	16.69	46.1	9.69	1.62	4.12	5.44	12.18	4	2.97	4.81	3.47	5.59	0.94	6.41	15.12	5.25	1.59	3.63	6.5	4.19	2.34
2259-CON	41.43	60	9	3.12	7.28	6.69	7.63	4.19	11.84	24.72	7.5	20.82	8.88	6.4	10.28	1.63	10.78	4.72	4.16	8	3.25	5.81	9.66	6.69
2066-MUT	60	60	46.85	60	60	60	1.75	60	48.78	10.22	57	4.78	60	60	60	18.75	60	21.58	28.35	60	5.97	10.1	60	40.72
2068-MUT	60	60	33.19	60	15.13	14.06	3.06	15.69	42.28	7.81	17.78	3.16	60	46.53	31.47	11.37	26	37.47	39.54	4.22	13.53	20.59	28	13.62
2009-MUT	60	60	4.31	2.16	60	39.53	3.38	9.34	3.16	60	60	56.65	16.34	41.65	60	2.56	24.06	44.62	3.81	5.19	60	22.72	3.93	31.97
2141-MUT	60	60	3.84	3.06	8.13	11.12	4.82	35.32	4.66	27.19	7.37	6.84	18.22	4.12	16	1.5	16.38	6.44	3.35	51.28	5.18	3.97	5.19	3.34
2063-MUT	36.16	60	6.97	1.96	24.15	14.9	8.03	12.43	15.93	21.22	60	6.96	7.82	44.44	43.53	56.72	9.19	6.38	5.81	19.09	3.5	13.31	7.28	3.56
2193-MUT	60	60	53.31	21.41	60	16.75	5.47	60	60	6.37	38.34	2.78	14.91	60	14.25	13.93	25.35	19.32	5.54	2.46	51.5	60	11.88	60
2146-MUT	60	60	60	60	60	60	60	60	5.03	60	60	2.53	60	60	60	7.6	60	60	60	38.5	33.81	43.56	14.87	3.1
2256-MUT	60	60	60	60	54.68	60	60	35.06	20.06	60	16.38	20.82	14.91	19.57	42.31	21.93	60	27.44	60	60	60	13.41	9.66	60
	Time in the target quadrant (s)	The percentage of time in target quadrant								D1	D2	D3	D4	D5	D6
CON	32.6358	54.3931	CON						CON	33.6902	17.6313	10.716	8.86208	7.7225	6.05542
MUT	23.3212	38.8687	MUT						MUT	46.0381	32.9	27.3156	32.8259	29.7303	24.3209
SEM-CON	1.798	2.99667							SEM-CON	3.38025	2.86327	1.55121	1.42495	0.905435	0.54
SEM-MUT	1.67139	2.78565							SEM-MUT	3.98837	4.25067	4.10815	3.87194	3.86506	3.79295
SD-CON	6.22847	10.3808							SD-CON	23.419	19.8373	10.7471	9.87236	6.27303	3.74123
SD-MUT	4.7274	7.87901							SD-MUT	22.5617	24.0454	23.2392	21.903	21.8641	21.4562
SQRT-C	3.4641	3.4641							SQRT-C	6.9282	6.9282	6.9282	6.9282	6.9282	6.9282
SQRT-M	2.82843	2.82843							SQRT-M	5.65685	5.65685	5.65685	5.65685	5.65685	5.65685
t-test	0.00211535	0.00211535							t-test	0.0216214	0.00272252	4.64531e-05	3.6358e-09	4.56294e-09	1.43487e-07
DAY7(Probe Trial）
NO	耳标号	Time in tne target quadrant(s）			The percentage of target quadrant
2	2067-CON	33.87			56.45
9	2137-CON	30.72			51.2
10	2140-CON	28.47			47.45
11	2138-CON	32.36			53.9333
12	2197-CON	39.27			65.45
13	2194-CON	21.76			36.2667
15	2195-CON	23.25			38.75
17	2059-CON	39.83			66.3833
19	2061-CON	41.35			68.9167
20	2147-CON	32.22			53.7
22	2257-CON	31.06			51.7667
23	2259-CON	37.47			62.45
1	2066-MUT	18.52			30.8667
3	2068-MUT	29.61			49.35
4	2009-MUT	21.11			35.1833
8	2141-MUT	22.33			37.2167
14	2193-MUT	26.94			44.9
16	2063-MUT	29.69			49.4833
21	2146-MUT	19.4			32.3333
24	2256-MUT	18.97			31.6167
