# Supplementary material for: The differentiation and integration of the hippocampal dorsoventral axis are controlled by two nuclear receptor genes
Source: eLife journal article supplement (doi:10.7554/elife.86940), 2023-05-10
Supplement: fig2-figsupp1-data1 [file Statistical summary of dendrite branches in dorsal HP CA1 neurons.xls]

## Sheet: Sheet1
NO	Numbers of apical dendrite(secondary dendrite)	Branch points(apical)	Numbers of basal dendrite(secondary dendrite)	Branch points(basal)
2134-CON-1-1	6	3	10	5
2134-CON-1-5a	8	4	8	4
2134-CON-2-4	9	4	8	4
2134-CON-4-2a	7	3	8	4
2134-CON-4-2b	9	4	6	3
2134-CON-5-6	10	4	9	4
2065-CON-3-2	8	4	8	4
2065-CON-4-1-1	6	3	9	4
2065-CON-4-1-2	7	3	8	4
2065-CON-4-1-2a	8	4	10	5
2065-CON-4-1-3	8	4	5	2
2065-CON-4-3-1	10	5	11	5
2065-CON-4-3-2	12	6	9	6
2065-CON-5-5-2	10	4	9	4
2065-CON-5-5-3	8	4	10	5
2366-CON-1-1	7	3	11	5
2366-CON-1-1-2(a)	8	4	13	6
2366-CON-1-1-2(b)	8	4	12	6
2366-CON-1-5(a)	9	3	7	3
2366-CON-1-5(b)	7	3	9	3
2366-CON-2-2	10	5	8	4
2366-CON-2-5-02	6	3	10	5
2366-CON-2-6	7	3	8	4
2366-CON-3-1	8	4	7	3
2366-CON-3-02	9	4	8	4
2366-CON-3-4	7	3	6	3
2366-CON-3-5	10	5	5	2
2366-CON-3-5-02	6	3	6	3
2366-CON-3-5-03	6	3	6	3
2366-CON-3-5-04	10	5	8	4
2366-CON-4-3	8	4	8	4
2366-CON-4-5	6	3	7	3
2366-CON-4-5-02	6	3	9	4
2366-CON-5-4	7	3	8	4
2130-MUT-2-1	8	4	2	1
2130-MUT-7-2	4	2	3	1
2130-MUT-2-1a	8	4	2	1
2130-MUT-2-1b	0	0	2	1
2130-MUT-2-6	2	1	6	3
2130-MUT-7-2a	4	2	5	2
2130-MUT-7-2b	5	2	6	3
2064-MUT-1-5-1	4	2	6	3
2064-MUT-1-5-2	4	2	6	3
2369-MUT-1-1	4	2	4	2
2369-MUT-1-1-2	6	3	4	2
2369-MUT-1-1-3(a)	5	2	3	1
2369-MUT-1-1-3(b)	4	2	2	1
2369-MUT-1-1-4	0	0	2	1
2369-MUT-1-6	4	2	5	2
2369-MUT-1-6-2	4	2	4	2
2369-MUT-1-6-3	2	1	4	2
2369-MUT-2-1	3	1	2	1
2369-MUT-2-2	5	2	7	3
2369-MUT-2-2-2	6	3	6	3
2369-MUT-6-6	4	2	6	3
2369-MUT-6-6-2	0	0	4	2
2369-MUT-6-6-3	5	2	0	0
