# Supplementary material for: The differentiation and integration of the hippocampal dorsoventral axis are controlled by two nuclear receptor genes
Source: eLife journal article supplement (doi:10.7554/elife.86940), 2023-05-10
Supplement: fig3-figsupp1-data3 [file GFAP+:Nestin+(3W).xlsx]

## Sheet: Sheet1
	3W
	GFAP+/Nestin+	CON	DKO
		5	1
		6	2
		6	3
