# Supplementary material for: The differentiation and integration of the hippocampal dorsoventral axis are controlled by two nuclear receptor genes
Source: eLife journal article supplement (doi:10.7554/elife.86940), 2023-05-10
Supplement: fig5-data3 [file ke20110628-1_data.xls]

## Sheet: Results
Well	Cт	Cт Mean	Cт SD	Quantity	Quantity Mean	Quantity SD	Automatic Ct Threshold	Ct Threshold	Automatic Baseline	Baseline Start	Baseline End	Tm1	Tm2	Tm3	Comments	HIGHSD	OUTLIERRG
A1	18.9057	18.7863	0.193463				TRUE	0.181018	TRUE	3	13	69.4927				N	N
A2	18.5631	18.7863	0.193463				TRUE	0.181018	TRUE	3	13	69.94				N	N
A3	18.89	18.7863	0.193463				TRUE	0.181018	TRUE	3	13	67.8522				N	N
A4	18.9766	18.6852	0.25628				TRUE	0.181018	TRUE	3	14	75.9062				N	N
A5	18.4949	18.6852	0.25628				TRUE	0.181018	TRUE	3	13	68.2983				N	N
A6	18.5841	18.6852	0.25628				TRUE	0.181018	TRUE	3	13	69.193				N	N
A7	28.9369	28.9076	0.0653974				TRUE	1.1065	TRUE	3	21	82.9125				N	N
A8	28.9532	28.9076	0.0653974				TRUE	1.1065	TRUE	3	21	82.9125				N	N
A9	28.8327	28.9076	0.0653974				TRUE	1.1065	TRUE	3	21	82.7676				N	N
A10	28.5704	28.6264	0.0495374				TRUE	1.1065	TRUE	3	20	82.7676				N	N
A11	28.6644	28.6264	0.0495374				TRUE	1.1065	TRUE	3	20	82.6133				N	N
A12	28.6444	28.6264	0.0495374				TRUE	1.1065	TRUE	3	20	82.7625				N	N
B1	24.888	24.827	0.0582161				TRUE	0.361699	TRUE	3	18	66.8087				N	N
B2	24.8209	24.827	0.0582161				TRUE	0.361699	TRUE	3	18	62.7828				N	N
B3	24.772	24.827	0.0582161				TRUE	0.361699	TRUE	3	18	66.3608				N	N
B4	25.9775	25.9706	0.00654267				TRUE	0.361699	TRUE	3	20	69.7912				N	N
B5	25.9645	25.9706	0.00654267				TRUE	0.361699	TRUE	3	20	65.4648				N	N
B6	25.9698	25.9706	0.00654267				TRUE	0.361699	TRUE	3	20	66.5087				N	N
B7	25.9437	25.7048	0.208271				TRUE	0.914835	TRUE	3	18	82.4651				N	N
B8	25.6096	25.7048	0.208271				TRUE	0.914835	TRUE	3	18	82.4651				N	N
B9	25.5612	25.7048	0.208271				TRUE	0.914835	TRUE	3	18	82.4693				N	N
B10	25.6459	25.6466	0.028995				TRUE	0.914835	TRUE	3	18	82.4693				N	N
B11	25.6179	25.6466	0.028995				TRUE	0.914835	TRUE	3	17	82.315				N	N
B12	25.6759	25.6466	0.028995				TRUE	0.914835	TRUE	3	18	82.315				N	N
C1	24.9516	24.9787	0.0303336				TRUE	0.500498	TRUE	3	18	67.4051				N	N
C2	24.9731	24.9787	0.0303336				TRUE	0.500498	TRUE	3	18	65.4667				N	N
C3	25.0114	24.9787	0.0303336				TRUE	0.500498	TRUE	3	19	66.5099				N	N
C4	25.7376	25.7315	0.0104294				TRUE	0.500498	TRUE	3	19	63.9744				N	N
C5	25.7194	25.7315	0.0104294				TRUE	0.500498	TRUE	3	19	65.6139				N	N
C6	25.7374	25.7315	0.0104294				TRUE	0.500498	TRUE	3	19	65.9122				N	N
C7	26.9599	26.9449	0.0200028				TRUE	0.504752	TRUE	3	20	80.0789				N	N
C8	26.9222	26.9449	0.0200028				TRUE	0.504752	TRUE	3	20	80.2281				N	N
C9	26.9527	26.9449	0.0200028				TRUE	0.504752	TRUE	3	20	80.0834				N	N
C10	26.7634	26.7288	0.0311547				TRUE	0.504752	TRUE	3	19	80.0834				N	N
C11	26.7198	26.7288	0.0311547				TRUE	0.504752	TRUE	3	20	80.0778				N	N
C12	26.7031	26.7288	0.0311547				TRUE	0.504752	TRUE	3	20	80.0778				N	N
D1	26.9714	26.9794	0.0083629				TRUE	0.433904	TRUE	3	20	65.6158				N	N
D2	26.9881	26.9794	0.0083629				TRUE	0.433904	TRUE	3	20	65.914				N	N
D3	26.9787	26.9794	0.0083629				TRUE	0.433904	TRUE	3	21	65.3167				N	N
D4	26.8405	26.8582	0.0172019				TRUE	0.433904	TRUE	3	20	66.3608				N	N
D5	26.8592	26.8582	0.0172019				TRUE	0.433904	TRUE	3	20	64.7192				N	N
D6	26.8749	26.8582	0.0172019				TRUE	0.433904	TRUE	3	20	65.4648				N	N
D7	22.9529	22.5921	0.313609				TRUE	0.980282	TRUE	3	15	80.5263				N	N
D8	22.3854	22.5921	0.313609				TRUE	0.980282	TRUE	3	14	80.6755				N	N
D9	22.4378	22.5921	0.313609				TRUE	0.980282	TRUE	3	14	80.6799				N	N
D10	22.374	22.3492	0.0518063				TRUE	0.980282	TRUE	3	14	80.6799				N	N
D11	22.2897	22.3492	0.0518063				TRUE	0.980282	TRUE	3	14	80.5252				N	N
D12	22.384	22.3492	0.0518063				TRUE	0.980282	TRUE	3	14	80.5252				N	N
E1	26.9357	26.9448	0.0262797				TRUE	0.363656	TRUE	3	21	65.914				N	N
E2	26.9744	26.9448	0.0262797				TRUE	0.363656	TRUE	3	21	67.1069				N	N
E3	26.9243	26.9448	0.0262797				TRUE	0.363656	TRUE	3	21	65.0184				N	N
E4	26.7472	26.7202	0.0383934				TRUE	0.363656	TRUE	3	21	66.6591				N	N
E5	26.6762	26.7202	0.0383934				TRUE	0.363656	TRUE	3	21	64.4209				N	N
E6	26.7371	26.7202	0.0383934				TRUE	0.363656	TRUE	3	21	64.8683				N	N
E7	25.9219	25.9237	0.0172692				TRUE	0.94336	TRUE	3	17	79.4824				N	N
E8	25.9417	25.9237	0.0172692				TRUE	0.94336	TRUE	3	18	79.4824				N	N
E9	25.9073	25.9237	0.0172692				TRUE	0.94336	TRUE	3	18	79.4869				N	N
E10	25.7285	25.7758	0.0509211				TRUE	0.94336	TRUE	3	18	79.4869				N	N
E11	25.8297	25.7758	0.0509211				TRUE	0.94336	TRUE	3	18	79.4812				N	N
E12	25.7693	25.7758	0.0509211				TRUE	0.94336	TRUE	3	17	79.4812				N	N
F1	27.6804	27.627	0.0580875				TRUE	0.204394	TRUE	3	22	66.0631				N	N
F2	27.6354	27.627	0.0580875				TRUE	0.204394	TRUE	3	22	66.5105				N	N
F3	27.5651	27.627	0.0580875				TRUE	0.204394	TRUE	3	22	64.7201				N	N
F4	27.9594	27.8792	0.0810039				TRUE	0.204394	TRUE	3	23	66.6591				N	N
F5	27.8808	27.8792	0.0810039				TRUE	0.204394	TRUE	3	23	64.8683				N	N
F6	27.7975	27.8792	0.0810039				TRUE	0.204394	TRUE	3	22	65.6139				N	N
F7	27.1143	27.1164	0.12494				TRUE	0.0964123	TRUE	3	22	78.5875				N	N
F8	26.9926	27.1164	0.12494				TRUE	0.0964123	TRUE	3	22	78.5875				N	N
F9	27.2425	27.1164	0.12494				TRUE	0.0964123	TRUE	3	23	78.5921				N	N
F10	26.7204	27.4913	1.29088				TRUE	0.0964123	TRUE	3	22	78.5921				Y	N
F11	28.9816	27.4913	1.29088				TRUE	0.0964123	TRUE	3	24	78.1388				Y	Y
F12	26.7719	27.4913	1.29088				TRUE	0.0964123	TRUE	3	22	78.5863				Y	N
G1	29.9693	29.9628	0.0238553				TRUE	0.0728694	TRUE	3	26	68.7471				N	N
G2	29.9828	29.9628	0.0238553				TRUE	0.0728694	TRUE	3	26	69.94				N	N
G3	29.9364	29.9628	0.0238553				TRUE	0.0728694	TRUE	3	26	69.3437				N	N
G4	29.9557	29.9423	0.0493131				TRUE	0.0728694	TRUE	3	26	71.581				N	N
G5	29.9835	29.9423	0.0493131				TRUE	0.0728694	TRUE	3	26	68.5965				N	N
G6	29.8877	29.9423	0.0493131				TRUE	0.0728694	TRUE	3	26	76.9477				N	N
G7	23.7665	23.7955	0.139138				TRUE	0.720238	TRUE	3	17	80.5263				N	N
G8	23.6731	23.7955	0.139138				TRUE	0.720238	TRUE	3	16	80.5263				N	N
G9	23.9468	23.7955	0.139138				TRUE	0.720238	TRUE	3	17	80.5307				N	N
G10	23.7125	23.7116	0.0432665				TRUE	0.720238	TRUE	3	17	80.6799				N	N
G11	23.668	23.7116	0.0432665				TRUE	0.720238	TRUE	3	17	80.6744				N	N
G12	23.7545	23.7116	0.0432665				TRUE	0.720238	TRUE	3	16	80.6744				N	N
H1	20.9705	20.9	0.0627956				TRUE	0.270451	TRUE	3	15	67.1069				N	N
H2	20.85	20.9	0.0627956				TRUE	0.270451	TRUE	3	15	66.5105				N	N
H3	20.8794	20.9	0.0627956				TRUE	0.270451	TRUE	3	15	66.3608				N	N
H4	20.7949	20.7568	0.0633473				TRUE	0.270451	TRUE	3	15	67.7031				N	N
H5	20.7919	20.7568	0.0633473				TRUE	0.270451	TRUE	3	15	66.5087				N	N
H6	20.6837	20.7568	0.0633473				TRUE	0.270451	TRUE	3	15	65.4648				N	N
H7	23.8114	23.7871	0.0221146				TRUE	0.826902	TRUE	3	16	76.3505				N	N
H8	23.7682	23.7871	0.0221146				TRUE	0.826902	TRUE	3	16	76.4996				N	N
H9	23.7817	23.7871	0.0221146				TRUE	0.826902	TRUE	3	16	76.6535				N	N
H10	23.9369	23.9202	0.0683142				TRUE	0.826902	TRUE	3	16	76.6535				N	N
H11	23.845	23.9202	0.0683142				TRUE	0.826902	TRUE	3	16	76.4982				N	N
H12	23.9785	23.9202	0.0683142				TRUE	0.826902	TRUE	3	16	76.4982				N	N

## Sheet: 18S
18S	Taqman
Well	Cт	18S	dCt	ddCt	2^(-ddCt)	Average	STE	STD	Ttest
A1	18.9057			#VALUE!	#VALUE!	#VALUE!	#VALUE!	#VALUE!	#VALUE!	CON	#VALUE!	#VALUE!
A2	18.5631		18.5631	#VALUE!	#VALUE!					MUT	#VALUE!	#VALUE!
A3	18.89		18.89	#VALUE!	#VALUE!
A4	18.9766		18.9766	#VALUE!	#VALUE!	#VALUE!	#VALUE!	#VALUE!
A5	18.4949		18.4949	#VALUE!	#VALUE!
A6	18.5841		18.5841	#VALUE!	#VALUE!
			0								Normalize
Wnt3a			0								Average	STE
A7	28.9369	18.9057	10.0312	0	1	0.94766	0.12153	0.148844	0.402079	CON	1	0.128243
A8	28.9532	18.5631	10.3902	0.35898	0.779716					MUT	1.1406	0.206204
A9	28.8327	18.89	9.94268	-0.0884991	1.06326
A10	28.5704	18.9766	9.59378	-0.437397	1.35416	1.0809	0.195411	0.239328
A11	28.6644	18.4949	10.1695	0.138336	0.908566
A12	28.6444	18.5841	10.0604	0.0291901	0.97997
			0								Normalize
COUP-TFI			0								Average	STE
B1	24.888	18.9057	5.98226	0	1	0.966011	0.103202	0.126396	0.0152347	CON	1	0.106833
B2	24.8209	18.5631	6.25788	0.27562	0.826096					MUT	0.423831	0.0622625
B3	24.772	18.89	5.88204	-0.10022	1.07194
B4	25.9775	18.9766	7.00088	1.01862	0.493588	0.409425	0.0601462	0.0736638
B5	25.9645	18.4949	7.46957	1.48731	0.356676
B6	25.9698	18.5841	7.38576	1.4035	0.378012
			0								Normalize
Otx2			0								Average	STE
B7	25.9437	18.9057	7.03797	0	1	1.09451	0.137843	0.168822	0.886821	CON	1	0.12594
B8	25.6096	18.5631	7.0465	0.00853348	0.994103					MUT	0.973725	0.145807
B9	25.5612	18.89	6.67125	-0.366716	1.28941
B10	25.6459	18.9766	6.66934	-0.368626	1.29112	1.06575	0.159586	0.195452
B11	25.6179	18.4949	7.12302	0.0850506	0.942751
B12	25.6759	18.5841	7.09181	0.0538406	0.963368
			0								Normalize
COUP-TFII			0								Average	STE
C1	24.9516	18.9057	6.04583	0	1	0.908601	0.0954496	0.116901	0.0115115	CON	1	0.105051
C2	24.9731	18.5631	6.41007	0.364246	0.776875					MUT	0.555791	0.0816691
C3	25.0114	18.89	6.12146	0.0756302	0.948928
C4	25.7376	18.9766	6.76099	0.715162	0.609137	0.504992	0.0742046	0.0908817
C5	25.7194	18.4949	7.22455	1.17872	0.441743
C6	25.7374	18.5841	7.15333	1.1075	0.464096
			0								Normalize
Gsh2			0								Average	STE
C7	26.9599	18.9057	8.05416	0	1	0.934518	0.0884726	0.108356	0.363179	CON	1	0.0946718
C8	26.9222	18.5631	8.35915	0.304995	0.809445					MUT	1.08721	0.144978
C9	26.9527	18.89	8.06268	0.00852394	0.994109
C10	26.7634	18.9766	7.78681	-0.267349	1.20359	1.01601	0.135484	0.165934
C11	26.7198	18.4949	8.22488	0.170725	0.888396
C12	26.7031	18.5841	8.119	0.0648365	0.956054
			0								Normalize
Pax6			0								Average	STE
D1	26.9714	18.9057	8.06567	0	1	0.921213	0.10041	0.122977	0.841589	CON	1	0.108998
D2	26.9881	18.5631	8.42503	0.359365	0.779507					MUT	1.0199	0.162707
D3	26.9787	18.89	8.08874	0.023077	0.984131
D4	26.8405	18.9766	7.86391	-0.201757	1.1501	0.939549	0.149888	0.183575
D5	26.8592	18.4949	8.36429	0.298622	0.813029
D6	26.8749	18.5841	8.29079	0.225126	0.85552
			0								Normalize
Tbr1			0								Average	STE
D7	22.9529	18.9057	4.04718	0	1	1.19407	0.169797	0.207958	0.656276	CON	1	0.142201
D8	22.3854	18.5631	3.82237	-0.22481	1.16862					MUT	1.10185	0.149981
D9	22.4378	18.89	3.54783	-0.499348	1.41357
D10	22.374	18.9766	3.39739	-0.649788	1.56894	1.31568	0.179087	0.219336
D11	22.2897	18.4949	3.79481	-0.252377	1.19117
D12	22.384	18.5841	3.79994	-0.247246	1.18694
			0								Normalize
Fgf15			0								Average	STE
E1	26.9357	18.9057	8.02996	0	1	0.921572	0.108813	0.133268	0.421075	CON	1	0.118073
E2	26.9744	18.5631	8.41136	0.381392	0.767697					MUT	1.09076	0.147354
E3	26.9243	18.89	8.03427	0.00430679	0.997019
E4	26.7472	18.9766	7.77056	-0.259403	1.19698	1.00521	0.135798	0.166318
E5	26.6762	18.4949	8.18131	0.151348	0.900409
E6	26.7371	18.5841	8.15301	0.123047	0.918246
			0								Normalize
BMP4			0								Average	STE
E7	25.9219	18.9057	7.01621	0	1	0.925691	0.104548	0.128044	0.710977	CON	1	0.11294
E8	25.9417	18.5631	7.37867	0.362457	0.777839					MUT	1.04153	0.185087
E9	25.9073	18.89	7.01732	0.00110626	0.999233
E10	25.7285	18.9766	6.75186	-0.264357	1.2011	0.964133	0.171333	0.209839
E11	25.8297	18.4949	7.33479	0.318575	0.801862
E12	25.7693	18.5841	7.18525	0.169035	0.889437
			0								Normalize
Shh			0								Average	STE
F1	27.6804	18.9057	8.77466	0	1	0.961653	0.108709	0.13314	0.0795084	CON	1	0.113044
F2	27.6354	18.5631	9.07236	0.297701	0.813548					MUT	0.782697	0.090239
F3	27.5651	18.89	8.67515	-0.099514	1.07141
F4	27.9594	18.9766	8.98285	0.208183	0.865627	0.752683	0.0867787	0.106282
F5	27.8808	18.4949	9.3859	0.611238	0.654634
F6	27.7975	18.5841	9.21338	0.438721	0.737789
			0								Normalize
Fgf8			0								Average	STE
F7	27.1143	18.9057	8.20856	0	1	0.921011	0.05907	0.0723456	0.877054	CON	1	0.064136
F8	26.9926	18.5631	8.42956	0.221001	0.85797					MUT	0.941241	0.532534
F9	27.2425	18.89	8.35247	0.143911	0.905062
F10	26.7204	18.9766	7.74382	-0.464731	1.38006	0.866893	0.490469	0.6007
F11	28.9816	18.4949	10.4867	2.27815	0.206162
F12	26.7719	18.5841	8.18785	-0.0207062	1.01446
			0								Normalize
Gsh			0								Average	STE
G1	29.9693	18.9057	11.0636	0	1	0.931062	0.106058	0.129894	0.545523	CON	1	0.113911
G2	29.9828	18.5631	11.4197	0.356176	0.781232					MUT	0.949386	0.141173
G3	29.9364	18.89	11.0464	-0.0171432	1.01195
G4	29.9557	18.9766	10.9791	-0.0844212	1.06026	0.883937	0.13144	0.160981
G5	29.9835	18.4949	11.4886	0.425047	0.744815
G6	29.8877	18.5841	11.3036	0.240019	0.846734
			0								Normalize
Np1			0								Average	STE
G7	23.7665	18.9057	4.86082	0	1	0.904774	0.0685607	0.0839693	0.943173	CON	1	0.0757766
G8	23.6731	18.5631	5.11003	0.249214	0.841355					MUT	0.995733	0.148154
G9	23.9468	18.89	5.05682	0.196001	0.872967
G10	23.7125	18.9766	4.73585	-0.124964	1.09048	0.900913	0.134046	0.164172
G11	23.668	18.4949	5.17307	0.312252	0.805384
G12	23.7545	18.5841	5.1704	0.309584	0.806875
			0								Normalize
PPIA			0								Average	STE
H1	20.9705	18.9057	2.06473	0	1	0.970282	0.08289	0.101519	0.705914	CON	1	0.0854288
H2	20.85	18.5631	2.28699	0.222261	0.857221					MUT	1.03532	0.142457
H3	20.8794	18.89	1.98937	-0.0753632	1.05363
H4	20.7949	18.9766	1.81831	-0.246428	1.18627	1.00455	0.138224	0.169289
H5	20.7919	18.4949	2.297	0.232271	0.851294
H6	20.6837	18.5841	2.09963	0.0348988	0.9761
			0								Normalize
NP2			0								Average	STE
H7	23.8114	18.9057	4.90569	0	1	0.940774	0.0907532	0.11115	0.231177	CON	1	0.0964666
H8	23.7682	18.5631	5.20516	0.299465	0.812554					MUT	0.854039	0.120201
H9	23.7817	18.89	4.89167	-0.0140247	1.00977
H10	23.9369	18.9766	4.96029	0.0545979	0.962863	0.803457	0.113082	0.138496
H11	23.845	18.4949	5.35013	0.444435	0.734872
H12	23.9785	18.5841	5.39445	0.48876	0.712637

## Sheet: PPIA
18S	Taqman
Well	Cт	PPIA	dCt	ddCt	2^(-ddCt)	Average	STE	STD	Ttest (2,2)
A1	18.9057	20.9705	-2.06473	0	1	1.03855	0.0928683	0.11374	0.843317	CON	1	0.0894208
A2	18.5631	20.85	-2.28699	-0.222261	1.16656					MUT	0.976405	0.130583
A3	18.89	20.8794	-1.98937	0.0753632	0.949103
A4	18.9766	20.7949	-1.81831	0.246428	0.842981	1.01405	0.135617	0.166097
A5	18.4949	20.7919	-2.297	-0.232271	1.17468
A6	18.5841	20.6837	-2.09963	-0.0348988	1.02448
			0								Normalize
Wnt3a			0								Average	STE
A7	28.9369	20.9705	7.96644	0	1	0.972911	0.0449331	0.0550316	0.1264	CON	1	0.0461842
A8	28.9532	20.85	8.10316	0.136719	0.909586					MUT	1.10074	0.0577855
A9	28.8327	20.8794	7.95331	-0.0131359	1.00915
A10	28.5704	20.7949	7.77547	-0.190969	1.14153	1.07092	0.0562202	0.0688553
A11	28.6644	20.7919	7.87251	-0.093935	1.06728
A12	28.6444	20.6837	7.96073	-0.00570869	1.00396
			0								Normalize
COUP-TFI			0								Average	STE
B1	24.888	20.9705	3.91752	0	1	0.99369	0.0223676	0.0273946	6.27378e-06	CON	1	0.0225096
B2	24.8209	20.85	3.97088	0.0533581	0.963691					MUT	0.410032	0.0144076
B3	24.772	20.8794	3.89267	-0.0248566	1.01738
B4	25.9775	20.7949	5.18257	1.26505	0.416086	0.407445	0.0143167	0.0175343
B5	25.9645	20.7919	5.17257	1.25504	0.418982
B6	25.9698	20.6837	5.28612	1.3686	0.387267
			0								Normalize
Otx2			0								Average	STE
B7	25.9437	20.9705	4.97324	0	1	1.12782	0.0940972	0.115245	0.430257	CON	1	0.0834326
B8	25.6096	20.85	4.75951	-0.213728	1.15968					MUT	0.940686	0.0468868
B9	25.5612	20.8794	4.68188	-0.291353	1.22379
B10	25.6459	20.7949	4.85104	-0.122198	1.08839	1.06093	0.05288	0.0647645
B11	25.6179	20.7919	4.82602	-0.147221	1.10743
B12	25.6759	20.6837	4.99218	0.0189419	0.986956
			0								Normalize
COUP-TFII			0								Average	STE
C1	24.9516	20.9705	3.98109	0	1	0.935634	0.045572	0.055814	0.000245422	CON	1	0.0487071
C2	24.9731	20.85	4.12308	0.141985	0.906271					MUT	0.537197	0.0206617
C3	25.0114	20.8794	4.13209	0.150993	0.90063
C4	25.7376	20.7949	4.94268	0.96159	0.513491	0.502619	0.0193318	0.0236765
C5	25.7194	20.7919	4.92754	0.946449	0.518908
C6	25.7374	20.6837	5.0537	1.07261	0.47546
			0								Normalize
Gsh2			0								Average	STE
C7	26.9599	20.9705	5.98943	0	1	0.962593	0.0264525	0.0323976	0.13069	CON	1	0.0274805
C8	26.9222	20.85	6.07216	0.0827332	0.944267					MUT	1.0519	0.0272365
C9	26.9527	20.8794	6.07331	0.0838871	0.943512
C10	26.7634	20.7949	5.9685	-0.0209217	1.01461	1.01255	0.0262177	0.03211
C11	26.7198	20.7919	5.92788	-0.0615463	1.04358
C12	26.7031	20.6837	6.01936	0.0299377	0.979463
			0								Normalize
Pax6			0								Average	STE
D1	26.9714	20.9705	6.00093	0	1	0.947795	0.038267	0.0468673	0.739431	CON	1	0.0403747
D2	26.9881	20.85	6.13804	0.137104	0.909343					MUT	0.985104	0.0431332
D3	26.9787	20.8794	6.09937	0.0984402	0.934042
D4	26.8405	20.7949	6.0456	0.0446701	0.969511	0.933677	0.0408814	0.0500693
D5	26.8592	20.7919	6.06728	0.0663509	0.955051
D6	26.8749	20.6837	6.19116	0.190228	0.876467
			0								Normalize
Tbr1			0								Average	STE
D7	22.9529	20.9705	1.98245	0	1	1.23497	0.166381	0.203774	0.579952	CON	1	0.134725
D8	22.3854	20.85	1.53538	-0.447071	1.36327					MUT	1.06287	0.0608441
D9	22.4378	20.8794	1.55846	-0.423985	1.34163
D10	22.374	20.7949	1.57909	-0.40336	1.32258	1.31261	0.0751404	0.0920279
D11	22.2897	20.7919	1.4978	-0.484648	1.39924
D12	22.384	20.6837	1.7003	-0.282145	1.216
			0								Normalize
Fgf15			0								Average	STE
E1	26.9357	20.9705	5.96523	0	1	0.94728	0.0426414	0.0522248	0.290712	CON	1	0.0450146
E2	26.9744	20.85	6.12436	0.15913	0.895565					MUT	1.05828	0.0506448
E3	26.9243	20.8794	6.0449	0.07967	0.946274
E4	26.7472	20.7949	5.95226	-0.0129757	1.00903	1.00249	0.0479748	0.0587568
E5	26.6762	20.7919	5.88431	-0.0809231	1.05769
E6	26.7371	20.6837	6.05338	0.0881481	0.94073
			0								Normalize
BMP4			0								Average	STE
E7	25.9219	20.9705	4.95148	0	1	0.951924	0.0378886	0.0464039	0.938649	CON	1	0.0398021
E8	25.9417	20.85	5.09167	0.140196	0.907396					MUT	1.00346	0.0445466
E9	25.9073	20.8794	5.02795	0.0764694	0.948376
E10	25.7285	20.7949	4.93355	-0.0179291	1.01251	0.955218	0.0424049	0.0519352
E11	25.8297	20.7919	5.03778	0.0863037	0.941933
E12	25.7693	20.6837	5.08562	0.134136	0.911215
			0								Normalize
Shh			0								Average	STE
F1	27.6804	20.9705	6.70993	0	1	0.988645	0.0288313	0.035311	0.000536372	CON	1	0.0291625
F2	27.6354	20.85	6.78537	0.0754395	0.949053					MUT	0.760148	0.0165145
F3	27.5651	20.8794	6.68578	-0.0241508	1.01688
F4	27.9594	20.7949	7.16454	0.454611	0.729707	0.751516	0.016327	0.0199964
F5	27.8808	20.7919	7.0889	0.378967	0.768988
F6	27.7975	20.6837	7.11375	0.403822	0.755853
			0								Normalize
Fgf8			0								Average	STE
F7	27.1143	20.9705	6.14382	0	1	0.953291	0.0666763	0.0816615	0.148186	CON	1	0.0699434
F8	26.9926	20.85	6.14256	-0.00126076	1.00087					MUT	1.15529	0.0650747
F9	27.2425	20.8794	6.3631	0.219275	0.858997
F10	26.7204	20.7949	5.92552	-0.218304	1.16336	1.10133	0.0620351	0.0877308
F11	28.9816	20.7919	8.1897	2.04588	0.242175
F12	26.7719	20.6837	6.08822	-0.0556049	1.03929
	26.7204	20.7949	5.92552	-0.218304	1.16336						Normalize
Gsh			0								Average	STE
G1	29.9693	20.9705	8.99883	0	1	0.957268	0.036259	0.044408	0.0428183	CON	1	0.0378776
G2	29.9828	20.85	9.13274	0.133915	0.911355					MUT	0.917949	0.0115686
G3	29.9364	20.8794	9.05704	0.0582199	0.960448
G4	29.9557	20.7949	9.16083	0.162006	0.893781	0.878723	0.0110742	0.0135631
G5	29.9835	20.7919	9.1916	0.192776	0.874921
G6	29.8877	20.6837	9.20395	0.20512	0.867466
			0								Normalize
Np1			0								Average	STE
G7	23.7665	20.9705	2.79608	0	1	0.936676	0.0768389	0.0941081	0.57908	CON	1	0.0820336
G8	23.6731	20.85	2.82304	0.0269527	0.981491					MUT	0.957982	0.0546278
G9	23.9468	20.8794	3.06745	0.271364	0.828536
G10	23.7125	20.7949	2.91755	0.121464	0.919254	0.897319	0.0511686	0.0626684
G11	23.668	20.7919	2.87606	0.0799809	0.94607
G12	23.7545	20.6837	3.07077	0.274685	0.826631
			0								Normalize
PPIA			0								Average	STE
H1	20.9705	20.9705	0	0	1	1	0	0	#DIV/0!	CON	1	0
H2	20.85	20.85	0	0	1					MUT	1	0
H3	20.8794	20.8794	0	0	1
H4	20.7949	20.7949	0	0	1	1	0	0
H5	20.7919	20.7919	0	0	1
H6	20.6837	20.6837	0	0	1
			0								Normalize
NP2			0								Average	STE
H7	23.8114	20.9705	2.84096	0	1	0.968756	0.0225035	0.027561	0.0162974	CON	1	0.0232293
H8	23.7682	20.85	2.91817	0.0772038	0.947893					MUT	0.827523	0.0565871
H9	23.7817	20.8794	2.9023	0.0613384	0.958375
H10	23.9369	20.7949	3.14199	0.301025	0.811675	0.801668	0.0548191	0.0671394
H11	23.845	20.7919	3.05313	0.212164	0.863241
H12	23.9785	20.6837	3.29482	0.453861	0.730086
