# Supplementary material for: The differentiation and integration of the hippocampal dorsoventral axis are controlled by two nuclear receptor genes
Source: eLife journal article supplement (doi:10.7554/elife.86940), 2023-05-10
Supplement: fig5-data3 [file ke20110628-2_data.xls]

## Sheet: Results
Block Type	96well
Chemistry	SYBR_GREEN
Experiment File Name	D:\Applied Biosystems\StepOne Software v2.1\experiments\KE\ke20110628-2.eds
Experiment Run End Time	2011-06-28 19:12:40 PM CDT
Instrument Type	steponeplus
Passive Reference	ROX
Well	Sample Name	Target Name	Task	Reporter	Quencher	Cт	Cт Mean	Cт SD	Quantity	Quantity Mean	Quantity SD	Automatic Ct Threshold	Ct Threshold	Automatic Baseline	Baseline Start	Baseline End	Tm1	Tm2	Tm3	Comments	HIGHSD	MTP
A1	Sample 1	Target 1	UNKNOWN	FAM	NFQ-MGB	21.9996	21.8673	0.122142				TRUE	0.0130868	TRUE	3	20	72.0373				N	N
A2	Sample 1	Target 1	UNKNOWN	FAM	NFQ-MGB	21.8436	21.8673	0.122142				TRUE	0.0130868	TRUE	3	20	83.8139				N	N
A3	Sample 1	Target 1	UNKNOWN	FAM	NFQ-MGB	21.7587	21.8673	0.122142				TRUE	0.0130868	TRUE	3	20	73.3806				N	N
A4	Sample 2	Target 1	UNKNOWN	FAM	NFQ-MGB	21.5734	21.5625	0.0741693				TRUE	0.0130868	TRUE	3	20	76.5114				N	N
A5	Sample 2	Target 1	UNKNOWN	FAM	NFQ-MGB	21.4835	21.5625	0.0741693				TRUE	0.0130868	TRUE	3	20	80.9845				N	N
A6	Sample 2	Target 1	UNKNOWN	FAM	NFQ-MGB	21.6307	21.5625	0.0741693				TRUE	0.0130868	TRUE	3	20	71.8896				N	N
A7	Sample 1	Target 9	UNKNOWN	SYBR	None	21.9497	21.9406	0.0132026				TRUE	1.16246	TRUE	3	14	81.8787				N	N
A8	Sample 1	Target 9	UNKNOWN	SYBR	None	21.9467	21.9406	0.0132026				TRUE	1.16246	TRUE	3	14	81.8787				N	N
A9	Sample 1	Target 9	UNKNOWN	SYBR	None	21.9255	21.9406	0.0132026				TRUE	1.16246	TRUE	3	13	81.8797				N	N
A10	Sample 2	Target 9	UNKNOWN	SYBR	None	21.8385	21.8822	0.0494102				TRUE	1.16246	TRUE	3	13	81.8797				N	N
A11	Sample 2	Target 9	UNKNOWN	SYBR	None	21.8724	21.8822	0.0494102				TRUE	1.16246	TRUE	3	13	81.7264				N	N
A12	Sample 2	Target 9	UNKNOWN	SYBR	None	21.9358	21.8822	0.0494102				TRUE	1.16246	TRUE	3	13	81.7264				N	N
B1	Sample 1	Target 2	UNKNOWN	FAM	NFQ-MGB	34.8979	34.6625	0.210221				TRUE	0.0328908	TRUE	3	33	74.2734				N	N
B2	Sample 1	Target 2	UNKNOWN	FAM	NFQ-MGB	34.4936	34.6625	0.210221				TRUE	0.0328908	TRUE	3	32	76.5094				N	N
B3	Sample 1	Target 2	UNKNOWN	FAM	NFQ-MGB	34.596	34.6625	0.210221				TRUE	0.0328908	TRUE	3	32	71.8897				N	N
B4	Sample 2	Target 2	UNKNOWN	FAM	NFQ-MGB	34.5237	35.6129	2.07245				TRUE	0.0328908	TRUE	3	32	76.5114				Y	N
B5	Sample 2	Target 2	UNKNOWN	FAM	NFQ-MGB	34.3121	35.6129	2.07245				TRUE	0.0328908	TRUE	3	32	78.0025				Y	N
B6	Sample 2	Target 2	UNKNOWN	FAM	NFQ-MGB	38.0028	35.6129	2.07245				TRUE	0.0328908	TRUE	3	34	73.6787				Y	N
B7	Sample 1	Target 10	UNKNOWN	SYBR	None	23.9667	23.9447	0.0208689				TRUE	1.17985	TRUE	3	16	72.9322				N	N
B8	Sample 1	Target 10	UNKNOWN	SYBR	None	23.9252	23.9447	0.0208689				TRUE	1.17985	TRUE	3	16	72.9322				N	N
B9	Sample 1	Target 10	UNKNOWN	SYBR	None	23.9424	23.9447	0.0208689				TRUE	1.17985	TRUE	3	16	72.9354				N	N
B10	Sample 2	Target 10	UNKNOWN	SYBR	None	23.8199	23.8309	0.00983812				TRUE	1.17985	TRUE	3	15	72.9354				N	N
B11	Sample 2	Target 10	UNKNOWN	SYBR	None	23.8339	23.8309	0.00983812				TRUE	1.17985	TRUE	3	15	72.7809				N	N
B12	Sample 2	Target 10	UNKNOWN	SYBR	None	23.8389	23.8309	0.00983812				TRUE	1.17985	TRUE	3	15	72.7809				N	N
C1	Sample 1	Target 3	UNKNOWN	FAM	NFQ-MGB	28.9649	28.9718	0.0125025				TRUE	0.201448	TRUE	3	24	66.8199				N	N
C2	Sample 1	Target 3	UNKNOWN	FAM	NFQ-MGB	28.9862	28.9718	0.0125025				TRUE	0.201448	TRUE	3	24	65.9255				N	N
C3	Sample 1	Target 3	UNKNOWN	FAM	NFQ-MGB	28.9641	28.9718	0.0125025				TRUE	0.201448	TRUE	3	24	66.5226				N	N
C4	Sample 2	Target 3	UNKNOWN	FAM	NFQ-MGB	29.3215	29.3028	0.0225746				TRUE	0.201448	TRUE	3	24	68.7589				N	N
C5	Sample 2	Target 3	UNKNOWN	FAM	NFQ-MGB	29.3091	29.3028	0.0225746				TRUE	0.201448	TRUE	3	24	70.2495				N	N
C6	Sample 2	Target 3	UNKNOWN	FAM	NFQ-MGB	29.2777	29.3028	0.0225746				TRUE	0.201448	TRUE	3	24	73.2314				N	N
C7	Sample 1	Target 11	UNKNOWN	SYBR	None	24.9395	24.9508	0.0143109				TRUE	0.83093	TRUE	3	17	81.2823				N	N
C8	Sample 1	Target 11	UNKNOWN	SYBR	None	24.9669	24.9508	0.0143109				TRUE	0.83093	TRUE	3	18	81.2823				N	N
C9	Sample 1	Target 11	UNKNOWN	SYBR	None	24.946	24.9508	0.0143109				TRUE	0.83093	TRUE	3	17	81.1343				N	N
C10	Sample 2	Target 11	UNKNOWN	SYBR	None	24.7561	24.7989	0.0838741				TRUE	0.83093	TRUE	3	17	81.1343				N	N
C11	Sample 2	Target 11	UNKNOWN	SYBR	None	24.7451	24.7989	0.0838741				TRUE	0.83093	TRUE	3	17	81.13				N	N
C12	Sample 2	Target 11	UNKNOWN	SYBR	None	24.8955	24.7989	0.0838741				TRUE	0.83093	TRUE	3	17	81.13				N	N
D1	Sample 1	Target 4	UNKNOWN	FAM	NFQ-MGB	35.7158	35.6037	0.425534				TRUE	0.0266599	TRUE	3	34	83.5157				N	N
D2	Sample 1	Target 4	UNKNOWN	FAM	NFQ-MGB	35.9619	35.6037	0.425534				TRUE	0.0266599	TRUE	3	34	75.3169				N	N
D3	Sample 1	Target 4	UNKNOWN	FAM	NFQ-MGB	35.1333	35.6037	0.425534				TRUE	0.0266599	TRUE	3	33	78.7477				N	N
D4	Sample 2	Target 4	UNKNOWN	FAM	NFQ-MGB	34.5415	36.121	1.80679				TRUE	0.0266599	TRUE	3	32	72.486				Y	N
D5	Sample 2	Target 4	UNKNOWN	FAM	NFQ-MGB	35.7304	36.121	1.80679				TRUE	0.0266599	TRUE	3	34	75.1697				Y	N
D6	Sample 2	Target 4	UNKNOWN	FAM	NFQ-MGB	38.0911	36.121	1.80679				TRUE	0.0266599	TRUE	3	35	77.2571				Y	N
D7	Sample 1	Target 12	UNKNOWN	SYBR	None	27.8709	27.8571	0.0366558				TRUE	0.710271	TRUE	3	20	82.326				N	N
D8	Sample 1	Target 12	UNKNOWN	SYBR	None	27.8155	27.8571	0.0366558				TRUE	0.710271	TRUE	3	20	82.326	64.7312			N	Y
D9	Sample 1	Target 12	UNKNOWN	SYBR	None	27.8848	27.8571	0.0366558				TRUE	0.710271	TRUE	3	20	82.3269	65.0347			N	Y
D10	Sample 2	Target 12	UNKNOWN	SYBR	None	27.9302	27.8964	0.0625945				TRUE	0.710271	TRUE	3	21	82.3269				N	N
D11	Sample 2	Target 12	UNKNOWN	SYBR	None	27.8241	27.8964	0.0625945				TRUE	0.710271	TRUE	3	20	82.1736	65.1772			N	Y
D12	Sample 2	Target 12	UNKNOWN	SYBR	None	27.9348	27.8964	0.0625945				TRUE	0.710271	TRUE	3	21	82.1736				N	N
E1	Sample 1	Target 5	UNKNOWN	FAM	NFQ-MGB	27.8847	27.9428	0.0518926				TRUE	0.151732	TRUE	3	23	79.3418				N	N
E2	Sample 1	Target 5	UNKNOWN	FAM	NFQ-MGB	27.9592	27.9428	0.0518926				TRUE	0.151732	TRUE	3	23	78.8945				N	N
E3	Sample 1	Target 5	UNKNOWN	FAM	NFQ-MGB	27.9845	27.9428	0.0518926				TRUE	0.151732	TRUE	3	23	79.0459				N	N
E4	Sample 2	Target 5	UNKNOWN	FAM	NFQ-MGB	28.2033	28.112	0.0828036				TRUE	0.151732	TRUE	3	23	79.0459				N	N
E5	Sample 2	Target 5	UNKNOWN	FAM	NFQ-MGB	28.0417	28.112	0.0828036				TRUE	0.151732	TRUE	3	23	79.1953				N	N
E6	Sample 2	Target 5	UNKNOWN	FAM	NFQ-MGB	28.091	28.112	0.0828036				TRUE	0.151732	TRUE	3	23	78.8971				N	N
E7	Sample 1	Target 13	UNKNOWN	SYBR	None	22.6983	22.7926	0.110372				TRUE	0.63964	TRUE	3	14	78.7474				N	N
E8	Sample 1	Target 13	UNKNOWN	SYBR	None	22.7655	22.7926	0.110372				TRUE	0.63964	TRUE	3	15	78.7474				N	N
E9	Sample 1	Target 13	UNKNOWN	SYBR	None	22.914	22.7926	0.110372				TRUE	0.63964	TRUE	3	16	78.7492				N	N
E10	Sample 2	Target 13	UNKNOWN	SYBR	None	22.5538	22.5486	0.00481843				TRUE	0.63964	TRUE	3	15	78.7492				N	N
E11	Sample 2	Target 13	UNKNOWN	SYBR	None	22.5443	22.5486	0.00481843				TRUE	0.63964	TRUE	3	15	78.5954				N	N
E12	Sample 2	Target 13	UNKNOWN	SYBR	None	22.5477	22.5486	0.00481843				TRUE	0.63964	TRUE	3	14	78.7445				N	N
F1	Sample 1	Target 6	UNKNOWN	SYBR	None	23.7312	23.6765	0.055826				TRUE	0.714003	TRUE	3	16	79.938				N	N
F2	Sample 1	Target 6	UNKNOWN	SYBR	None	23.6785	23.6765	0.055826				TRUE	0.714003	TRUE	3	16	79.938	65.7764			N	Y
F3	Sample 1	Target 6	UNKNOWN	SYBR	None	23.6197	23.6765	0.055826				TRUE	0.714003	TRUE	3	15	80.0895	65.628			N	Y
F4	Sample 2	Target 6	UNKNOWN	SYBR	None	23.9564	23.9126	0.0379137				TRUE	0.714003	TRUE	3	16	80.0895				N	N
F5	Sample 2	Target 6	UNKNOWN	SYBR	None	23.8928	23.9126	0.0379137				TRUE	0.714003	TRUE	3	16	79.9408				N	N
F6	Sample 2	Target 6	UNKNOWN	SYBR	None	23.8887	23.9126	0.0379137				TRUE	0.714003	TRUE	3	16	79.9408				N	N
F7	Sample 1	Target 14	UNKNOWN	SYBR	None	25.9316	25.9303	0.0123534				TRUE	0.860329	TRUE	3	18	77.1072				N	N
F8	Sample 1	Target 14	UNKNOWN	SYBR	None	25.942	25.9303	0.0123534				TRUE	0.860329	TRUE	3	18	77.1072				N	N
F9	Sample 1	Target 14	UNKNOWN	SYBR	None	25.9174	25.9303	0.0123534				TRUE	0.860329	TRUE	3	17	77.1094				N	N
F10	Sample 2	Target 14	UNKNOWN	SYBR	None	25.5887	25.585	0.0542856				TRUE	0.860329	TRUE	3	17	77.1094				N	N
F11	Sample 2	Target 14	UNKNOWN	SYBR	None	25.529	25.585	0.0542856				TRUE	0.860329	TRUE	3	18	77.1045				N	N
F12	Sample 2	Target 14	UNKNOWN	SYBR	None	25.6374	25.585	0.0542856				TRUE	0.860329	TRUE	3	17	77.1045				N	N
G1	Sample 1	Target 7	UNKNOWN	SYBR	None	24.9262	24.9263	0.018809				TRUE	0.924942	TRUE	3	17	81.4287				N	N
G2	Sample 1	Target 7	UNKNOWN	SYBR	None	24.9452	24.9263	0.018809				TRUE	0.924942	TRUE	3	18	81.4287				N	N
G3	Sample 1	Target 7	UNKNOWN	SYBR	None	24.9076	24.9263	0.018809				TRUE	0.924942	TRUE	3	17	81.4313				N	N
G4	Sample 2	Target 7	UNKNOWN	SYBR	None	24.6384	24.6402	0.062356				TRUE	0.924942	TRUE	3	16	81.4313				N	N
G5	Sample 2	Target 7	UNKNOWN	SYBR	None	24.7035	24.6402	0.062356				TRUE	0.924942	TRUE	3	17	81.4318				N	N
G6	Sample 2	Target 7	UNKNOWN	SYBR	None	24.5788	24.6402	0.062356				TRUE	0.924942	TRUE	3	16	81.4318				N	N
G7	Sample 1	Target 15	UNKNOWN	SYBR	None	24.7896	24.7474	0.0397879				TRUE	0.378217	TRUE	3	19	80.8349				N	N
G8	Sample 1	Target 15	UNKNOWN	SYBR	None	24.7106	24.7474	0.0397879				TRUE	0.378217	TRUE	3	18	80.9841				N	N
G9	Sample 1	Target 15	UNKNOWN	SYBR	None	24.7419	24.7474	0.0397879				TRUE	0.378217	TRUE	3	18	80.9852	66.6744			N	Y
G10	Sample 2	Target 15	UNKNOWN	SYBR	None	24.8824	24.7969	0.074738				TRUE	0.378217	TRUE	3	19	80.9852				N	N
G11	Sample 2	Target 15	UNKNOWN	SYBR	None	24.7438	24.7969	0.074738				TRUE	0.378217	TRUE	3	18	80.9809				N	N
G12	Sample 2	Target 15	UNKNOWN	SYBR	None	24.7646	24.7969	0.074738				TRUE	0.378217	TRUE	3	18	80.9809				N	N
H1	Sample 1	Target 8	UNKNOWN	SYBR	None	29.8653	29.7847	0.103187				TRUE	1.1913	TRUE	3	21	84.112				N	N
H2	Sample 1	Target 8	UNKNOWN	SYBR	None	29.6684	29.7847	0.103187				TRUE	1.1913	TRUE	3	21	84.112				N	N
H3	Sample 1	Target 8	UNKNOWN	SYBR	None	29.8204	29.7847	0.103187				TRUE	1.1913	TRUE	3	21	84.1148				N	N
H4	Sample 2	Target 8	UNKNOWN	SYBR	None	29.9629	29.9481	0.0133473				TRUE	1.1913	TRUE	3	22	84.1148				N	N
H5	Sample 2	Target 8	UNKNOWN	SYBR	None	29.9444	29.9481	0.0133473				TRUE	1.1913	TRUE	3	21	84.1155				N	N
H6	Sample 2	Target 8	UNKNOWN	SYBR	None	29.937	29.9481	0.0133473				TRUE	1.1913	TRUE	3	22	84.1155				N	N
H7	Sample 1	Target 16	UNKNOWN	SYBR	None	22.8004	22.8202	0.137348				TRUE	0.626659	TRUE	3	15	76.9581				N	N
H8	Sample 1	Target 16	UNKNOWN	SYBR	None	22.9664	22.8202	0.137348				TRUE	0.626659	TRUE	3	16	76.9581				N	N
H9	Sample 1	Target 16	UNKNOWN	SYBR	None	22.6938	22.8202	0.137348				TRUE	0.626659	TRUE	3	15	77.2585				N	N
H10	Sample 2	Target 16	UNKNOWN	SYBR	None	22.9416	22.8869	0.0902051				TRUE	0.626659	TRUE	3	15	77.1094				N	N
H11	Sample 2	Target 16	UNKNOWN	SYBR	None	22.7828	22.8869	0.0902051				TRUE	0.626659	TRUE	3	16	77.1045				N	N
H12	Sample 2	Target 16	UNKNOWN	SYBR	None	22.9362	22.8869	0.0902051				TRUE	0.626659	TRUE	3	15	77.1045				N	N

## Sheet: 18S
Gli3
Well	Cт	18S	dCt	ddCt	2^(-ddCt)	Average	STE	STD	Ttest
A1	21.9996	18.9057	3.09383	0	1	1.01581	0.119025	0.145776	0.426256	CON	1	0.117173
A2	21.8436	18.5631	3.28058	0.186758	0.878578					MUT	1.15515	0.16646
A3	21.7587	18.89	2.86875	-0.225079	1.16884
A4	21.5734	18.9766	2.59682	-0.497009	1.41128	1.17341	0.169091	0.207093
A5	21.4835	18.4949	2.98863	-0.105198	1.07564
A6	21.6307	18.5841	3.04657	-0.0472527	1.0333
			0								Normalize
Lhx2			0								Average	STE
A7	21.9497	18.9057	3.04399	0	1	0.932056	0.100299	0.12284	0.855083	CON	1	0.10761
A8	21.9467	18.5631	3.3836	0.339613	0.790253					MUT	0.978508	0.168937		1	0.0131885
A9	21.9255	18.89	3.03548	-0.00850677	1.00591									1.00591
A10	21.8385	18.9766	2.86187	-0.182121	1.13455	0.912024	0.157458	0.192846
A11	21.8724	18.4949	3.37748	0.33349	0.793614									0.793614
A12	21.9358	18.5841	3.35173	0.307739	0.807907									0.807907
			0								Normalize
Fgfr2			0								Average	STE
B1	34.8979	18.9057	15.9922	0	1	1.08769	0.0948168	0.116126	0.669122	CON	1	0.0871724
B2	34.4936	18.5631	15.9305	-0.0616894	1.04369					MUT	0.791699	0.506916
B3	34.596	18.89	15.706	-0.28616	1.21939
B4	34.5237	18.9766	15.5471	-0.445093	1.3614	0.861125	0.551369	0.675287
B5	34.3121	18.4949	15.8172	-0.175005	1.12897
B6	38.0028	18.5841	19.4187	3.42653	0.093006
			0								Normalize
bmpr1a			0								Average	STE
B7	23.9667	18.9057	5.06096	0	1	0.93919	0.0902465	0.110529	0.878372	CON	1	0.0960897
B8	23.9252	18.5631	5.36211	0.301144	0.811609					MUT	1.01569	0.158745		1	0.0254314
B9	23.9424	18.89	5.05239	-0.00857544	1.00596									1.00596
B10	23.8199	18.9766	4.84333	-0.21763	1.16282	0.953925	0.149092	0.182599
B11	23.8339	18.4949	5.33903	0.278065	0.824697									0.824697
B12	23.8389	18.5841	5.25484	0.193872	0.874256									0.874256
			0								Normalize
Lhx6			0								Average	STE
C1	28.9649	18.9057	10.0592	0	1	0.922251	0.102758	0.125853	0.049186	CON	1	0.111421
C2	28.9862	18.5631	10.4231	0.36392	0.77705					MUT	0.743515	0.105754
C3	28.9641	18.89	10.0741	0.0149326	0.989703
C4	29.3215	18.9766	10.3449	0.285648	0.820373	0.685708	0.0975316	0.119451
C5	29.3091	18.4949	10.8142	0.755022	0.592537
C6	29.2777	18.5841	10.6936	0.63439	0.644213
			0								Normalize
Axin2			0								Average	STE
C7	24.9395	18.9057	6.03372	0	1	0.919463	0.103236	0.126438	0.738818	CON	1	0.112279
C8	24.9669	18.5631	6.40381	0.37009	0.773734					MUT	1.04346	0.180107
C9	24.946	18.89	6.05603	0.0223103	0.984655
C10	24.7561	18.9766	5.77948	-0.254236	1.1927	0.959422	0.165601	0.202819
C11	24.7451	18.4949	6.25018	0.216455	0.860677
C12	24.8955	18.5841	6.31146	0.277737	0.824884
			0								Normalize
Six3			0								Average	STE
D1	35.7158	18.9057	16.8101	0	1	1.0487	0.335026	0.410321	0.962732	CON	1	0.319468
D2	35.9619	18.5631	17.3988	0.588785	0.664903					MUT	1.03917	0.893614
D3	35.1333	18.89	16.2433	-0.566765	1.4812
D4	34.5415	18.9766	15.5649	-1.24519	2.3705	1.08978	0.937133	1.14775
D5	35.7304	18.4949	17.2355	0.425398	0.744633
D6	38.0911	18.5841	19.5071	2.69701	0.154213
			0								Normalize
Lef1			0								Average	STE
D7	27.8709	18.9057	8.96514	0	1	0.93302	0.0807542	0.0989033	0.343012	CON	1	0.0865514
D8	27.8155	18.5631	9.25246	0.287319	0.819423					MUT	0.911182	0.119752
D9	27.8848	18.89	8.99482	0.0296803	0.979637
D10	27.9302	18.9766	8.95361	-0.0115299	1.00802	0.850152	0.111731	0.136841
D11	27.8241	18.4949	9.32925	0.364117	0.776944
D12	27.9348	18.5841	9.35069	0.385551	0.765486
			0								Normalize
Nkx2.1			0								Average	STE
E1	27.8847	18.9057	8.97894	0	1	0.890629	0.105063	0.128675	0.0755394	CON	1	0.117965
E2	27.9592	18.5631	9.39619	0.417257	0.748847					MUT	0.827258	0.0841569		1	0.0197932
E3	27.9845	18.89	9.09447	0.115536	0.923039									0.923039
E4	28.2033	18.9766	9.22668	0.24774	0.842215	0.73678	0.0749525	0.0917977
E5	28.0417	18.4949	9.54682	0.567886	0.674604									0.674604
E6	28.091	18.5841	9.50693	0.527988	0.693521									0.693521
			0								Normalize
Emx2			0								Average	STE
E7	22.6983	18.9057	3.79252	0	1	0.86815	0.101634	0.124476	0.122619	CON	1	0.11707
E8	22.7655	18.5631	4.20243	0.409914	0.752668					MUT	1.10809	0.163832
E9	22.914	18.89	4.02396	0.231443	0.851782
E10	22.5538	18.9766	3.57722	-0.215303	1.16095	0.961992	0.142231	0.174196
E11	22.5443	18.4949	4.04941	0.256893	0.836888
E12	22.5477	18.5841	3.96366	0.171143	0.888139
			0								Normalize
Wnt7b			0								Average	STE
F1	23.7312	18.9057	4.82552	0	1	0.962217	0.105798	0.129575	0.0721427	CON	1	0.109952
F2	23.6785	18.5631	5.11543	0.289917	0.817949					MUT	0.722238	0.101581
F3	23.6197	18.89	4.72966	-0.0958576	1.0687
F4	23.9564	18.9766	4.97975	0.15423	0.898612	0.694949	0.0977432	0.119711
F5	23.8928	18.4949	5.39793	0.572416	0.67249
F6	23.8887	18.5841	5.30465	0.479134	0.717408
			0								Normalize
Bmpr1b			0								Average	STE
F7	25.9316	18.9057	7.02585	0	1	0.927291	0.102086	0.125029	0.229795	CON	1	0.11009
F8	25.942	18.5631	7.37891	0.35306	0.782922					MUT	1.18899	0.17517
F9	25.9174	18.89	7.02736	0.00151253	0.998952
F10	25.5887	18.9766	6.61212	-0.413731	1.33213	1.10254	0.162434	0.19894
F11	25.529	18.4949	7.03408	0.00823212	0.99431
F12	25.6374	18.5841	7.05327	0.0274239	0.981171
			0								Normalize
Wnt8b			0								Average	STE
G1	24.9262	18.9057	6.02042	0	1	0.926722	0.10501	0.128611	0.233662	CON	1	0.113314
G2	24.9452	18.5631	6.38218	0.361752	0.778219					MUT	1.14308	0.180955
G3	24.9076	18.89	6.01762	-0.00280571	1.00195
G4	24.6384	18.9766	5.66178	-0.358643	1.28222	1.05931	0.167695	0.205384
G5	24.7035	18.4949	6.20856	0.188141	0.877736
G6	24.5788	18.5841	5.9947	-0.0257206	1.01799
			0								Normalize
Lhx5			0								Average	STE
G7	24.7896	18.9057	5.88392	0	1	0.951804	0.0845332	0.103532	0.253256	CON	1	0.0888137
G8	24.7106	18.5631	6.1476	0.26368	0.832961					MUT	0.902005	0.0953028
G9	24.7419	18.89	5.85189	-0.032032	1.02245
G10	24.8824	18.9766	5.90578	0.0218658	0.984958	0.858532	0.0907096	0.111096
G11	24.7438	18.4949	6.24889	0.364971	0.776484
G12	24.7646	18.5841	6.18054	0.296625	0.814155
			0								Normalize
Ngn2			0								Average	STE
H1	29.8653	18.9057	10.9596	0	1	0.974755	0.0508037	0.0622216	0.0174894	CON	1	0.0521195
H2	29.6684	18.5631	11.1054	0.1458	0.903878					MUT	0.755802	0.0252984
H3	29.8204	18.89	10.9305	-0.0291157	1.02039
H4	29.9629	18.9766	10.9863	0.0267048	0.98166	0.736722	0.0246598	0.0348742
H5	29.9444	18.4949	11.4495	0.489925	0.712062
H6	29.937	18.5841	11.3529	0.393309	0.761381
			0								Normalize
Mash1			0								Average	STE
H7	22.8004	18.9057	3.89463	0	1	0.922608	0.15763	0.193056	0.454888	CON	1	0.170852		1	0.0156969
H8	22.9664	18.5631	4.40331	0.508684	0.702863					MUT	0.882288	0.10705		1.06496
H9	22.6938	18.89	3.80383	-0.0907993	1.06496
H10	22.9416	18.9766	3.96505	0.0704193	0.952361	0.814005	0.0987652	0.120962						0.761414
H11	22.7828	18.4949	4.28787	0.393248	0.761414									0.728241
H12	22.9362	18.5841	4.35214	0.457512	0.728241

## Sheet: PPIA
Gli3
Well	Cт	PPIA	dCt	ddCt	2^(-ddCt)	Average	STE	STD	Ttest (2,2)
A1	21.9996	20.9705	1.02909	0	1	1.04476	0.0467948	0.0573117	0.139846	CON	1	0.0447902
A2	21.8436	20.85	0.993589	-0.0355034	1.02491					MUT	1.12046	0.0811178
A3	21.7587	20.8794	0.879377	-0.149715	1.10935
A4	21.5734	20.7949	0.778511	-0.250582	1.18969	1.17061	0.0847482	0.103795
A5	21.4835	20.7919	0.691624	-0.337469	1.26354
A6	21.6307	20.6837	0.946941	-0.0821514	1.0586
			0								Normalize
Lhx2			0								Average	STE
A7	21.9497	20.9705	0.979254	0	1	0.958865	0.0320276	0.0392257	0.305797	CON	1	0.0334016
A8	21.9467	20.85	1.09661	0.117352	0.921878					MUT	0.94429	0.0582572
A9	21.9255	20.8794	1.04611	0.0668564	0.954716
A10	21.8385	20.7949	1.04356	0.0643063	0.956405	0.905446	0.0558607	0.0684152
A11	21.8724	20.7919	1.08047	0.101219	0.932245
A12	21.9358	20.6837	1.25209	0.27284	0.827688
			0								Normalize
Fgfr2			0								Average	STE
B1	34.8979	20.9705	13.9275	0	1	1.12495	0.0917075	0.112318	0.37205	CON	1	0.0815214
B2	34.4936	20.85	13.6435	-0.283951	1.21752					MUT	1.09952	0.079356
B3	34.596	20.8794	13.7167	-0.210796	1.15733
B4	34.5237	20.7949	13.7288	-0.198666	1.14764	1.23691	0.0892716	0.126249
B5	34.3121	20.7919	13.5202	-0.407276	1.32618
B6	38.0028	20.6837	17.3191	3.39163	0.0952832
			0								Normalize
bmpr1a			0								Average	STE
B7	23.9667	20.9705	2.99623	0	1	0.967184	0.0234314	0.0286974	0.576586	CON	1	0.0242264
B8	23.9252	20.85	3.07511	0.0788822	0.946791					MUT	0.980391	0.0387285
B9	23.9424	20.8794	3.06302	0.0667877	0.954761
B10	23.8199	20.7949	3.02503	0.0287971	0.980237	0.948219	0.0374576	0.045876
B11	23.8339	20.7919	3.04202	0.0457935	0.968757
B12	23.8389	20.6837	3.1552	0.158974	0.895662
			0								Normalize
Lhx6			0								Average	STE
C1	28.9649	20.9705	7.99447	0	1	0.948602	0.0387397	0.0474463	0.000853314	CON	1	0.0408387
C2	28.9862	20.85	8.13613	0.141659	0.906476					MUT	0.719511	0.0169144
C3	28.9641	20.8794	8.08477	0.0902958	0.93933
C4	29.3215	20.7949	8.52655	0.532076	0.691559	0.68253	0.0160451	0.0196511
C5	29.3091	20.7919	8.51723	0.522751	0.696043
C6	29.2777	20.6837	8.59397	0.599491	0.659987
			0								Normalize
Axin2			0								Average	STE
C7	24.9395	20.9705	3.96899	0	1	0.945716	0.0405381	0.0496488	0.901225	CON	1	0.042865
C8	24.9669	20.85	4.11682	0.147829	0.902608					MUT	1.00859	0.0813571
C9	24.946	20.8794	4.06666	0.0976734	0.934539
C10	24.7561	20.7949	3.96118	-0.00780869	1.00543	0.953844	0.0769406	0.0942326
C11	24.7451	20.7919	3.95317	-0.0158157	1.01102
C12	24.8955	20.6837	4.21182	0.242838	0.845081
			0								Normalize
Six3			0								Average	STE
D1	35.7158	20.9705	14.7453	0	1	1.06049	0.260793	0.319405	0.933693	CON	1	0.245918
D2	35.9619	20.85	15.1119	0.366524	0.775649					MUT	0.952702	0.714195
D3	35.1333	20.8794	14.2539	-0.491402	1.40581
D4	34.5415	20.7949	13.7466	-0.998764	1.99829	1.01033	0.757394	0.927615
D5	35.7304	20.7919	14.9385	0.193127	0.874708
D6	38.0911	20.6837	17.4074	2.66211	0.157989
			0								Normalize
Lef1			0								Average	STE
D7	27.8709	20.9705	6.9004	0	1	0.961895	0.0289794	0.0354924	0.055938	CON	1	0.0301274
D8	27.8155	20.85	6.96546	0.0650578	0.955907					MUT	0.882507	0.0545138
D9	27.8848	20.8794	7.00545	0.105043	0.929777
D10	27.9302	20.7949	7.1353	0.234898	0.849745	0.848879	0.0524365	0.0642214
D11	27.8241	20.7919	7.03225	0.131845	0.912663
D12	27.9348	20.6837	7.25106	0.350653	0.784229
			0								Normalize
Nkx2.1			0								Average	STE
E1	27.8847	20.9705	6.9142	0	1	0.916545	0.0590203	0.0722848	0.023098	CON	1	0.0643943		1
E2	27.9592	20.85	7.1092	0.194996	0.873575					MUT	0.804805	0.0422833		0.873575
E3	27.9845	20.8794	7.1051	0.190899	0.87606									0.87606
E4	28.2033	20.7949	7.40837	0.494167	0.709971	0.73764	0.0387546	0.0474645						0.709971
E5	28.0417	20.7919	7.24982	0.335615	0.792446									0.792446
E6	28.091	20.6837	7.40729	0.49309	0.710502									0.710502
			0								Normalize
Emx2			0								Average	STE
E7	22.6983	20.9705	1.72779	0	1	0.895487	0.0791763	0.0969708	0.367415	CON	1	0.088417
E8	22.7655	20.85	1.91544	0.187653	0.878033					MUT	1.06892	0.0374212
E9	22.914	20.8794	2.03459	0.306807	0.808429
E10	22.5538	20.7949	1.75891	0.0311241	0.978657	0.957207	0.0335102	0.0410415
E11	22.5443	20.7919	1.75241	0.024622	0.983078
E12	22.5477	20.6837	1.86403	0.136244	0.909885
			0								Normalize
Wnt7b			0								Average	STE
F1	23.7312	20.9705	2.76078	0	1	0.989498	0.0256426	0.0314056	0.000694433	CON	1	0.0259147
F2	23.6785	20.85	2.82844	0.0676556	0.954187					MUT	0.768891	0.0228094
F3	23.6197	20.8794	2.74029	-0.0204945	1.01431
F4	23.9564	20.7949	3.16144	0.400658	0.757513	0.760816	0.0225699	0.0276424
F5	23.8928	20.7919	3.10093	0.340145	0.789962
F6	23.8887	20.6837	3.20502	0.444235	0.734974
			0								Normalize
Bmpr1b			0								Average	STE
F7	25.9316	20.9705	4.96112	0	1	0.953812	0.0356136	0.0436176	0.0569762	CON	1	0.0373382
F8	25.942	20.85	5.09192	0.130798	0.913326					MUT	1.15192	0.0719631
F9	25.9174	20.8794	5.03799	0.0768757	0.948109
F10	25.5887	20.7949	4.79381	-0.167303	1.12296	1.09872	0.0686392	0.0840655
F11	25.529	20.7919	4.73708	-0.224039	1.168
F12	25.6374	20.6837	4.95364	-0.0074749	1.00519
			0								Normalize
Wnt8b			0								Average	STE
G1	24.9262	20.9705	3.95569	0	1	0.95293	0.0376502	0.0461119	0.03203	CON	1	0.0395099
G2	24.9452	20.85	4.09518	0.13949	0.90784					MUT	1.10356	0.0223021
G3	24.9076	20.8794	4.02825	0.0725574	0.950951
G4	24.6384	20.7949	3.84348	-0.112215	1.08089	1.05162	0.0212523	0.0260287
G5	24.7035	20.7919	3.91156	-0.0441303	1.03106
G6	24.5788	20.6837	3.89507	-0.0606194	1.04291
			0								Normalize
Lhx5			0								Average	STE
G7	24.7896	20.9705	3.81919	0	1	0.980704	0.0136547	0.0167235	0.0126734	CON	1	0.0139233
G8	24.7106	20.85	3.8606	0.0414181	0.971699					MUT	0.875736	0.038452
G9	24.7419	20.8794	3.86252	0.0433311	0.970412
G10	24.8824	20.7949	4.08748	0.268293	0.830301	0.858838	0.03771	0.0461851
G11	24.7438	20.7919	3.95189	0.1327	0.912123
G12	24.7646	20.6837	4.08091	0.261726	0.834089
			0								Normalize
Ngn2			0								Average	STE
H1	29.8653	20.9705	8.89484	0	1	1.00763	0.0355118	0.0434929	0.00323829	CON	1	0.035243
H2	29.6684	20.85	8.81838	-0.0764618	1.05443					MUT	0.808497	0.0245763
H3	29.8204	20.8794	8.94109	0.0462475	0.968452
H4	29.9629	20.7949	9.16797	0.273132	0.827521	0.814664	0.0247638	0.0303293
H5	29.9444	20.7919	9.15249	0.257654	0.836447
H6	29.937	20.6837	9.25325	0.35841	0.780024
			0								Normalize
Mash1			0								Average	STE
H7	22.8004	20.9705	1.82989	0	1	0.943563	0.0875303	0.107202	0.162338	CON	1	0.0927657
H8	22.9664	20.85	2.11632	0.286423	0.819933					MUT	0.863152	0.0647726
H9	22.6938	20.8794	1.81446	-0.0154362	1.01076
H10	22.9416	20.7949	2.14674	0.316847	0.802823	0.814438	0.061117	0.0748527
H11	22.7828	20.7919	1.99087	0.160976	0.89442
H12	22.9362	20.6837	2.25251	0.422613	0.746072
