# Supplementary material for: The differentiation and integration of the hippocampal dorsoventral axis are controlled by two nuclear receptor genes
Source: eLife journal article supplement (doi:10.7554/elife.86940), 2023-05-10
Supplement: fig5-data3 [file ke20110628-3_data.xls]

## Sheet: Results
Block Type	96well
Chemistry	SYBR_GREEN
Experiment File Name	D:\Applied Biosystems\StepOne Software v2.1\experiments\KE\ke20110628-3.eds
Experiment Run End Time	2011-06-28 23:59:57 PM CDT
Instrument Type	steponeplus
Passive Reference	ROX
Well	Sample Name	Target Name	Task	Reporter	Quencher	Cт	Cт Mean	Cт SD	Quantity	Quantity Mean	Quantity SD	Automatic Ct Threshold	Ct Threshold	Automatic Baseline	Baseline Start	Baseline End	Tm1	Tm2	Tm3	Comments	MTP
A1	Sample 1	Target 1	UNKNOWN	FAM	NFQ-MGB	25.9746	25.951	0.021746				TRUE	0.239677	TRUE	3	20	68.0135				N
A2	Sample 1	Target 1	UNKNOWN	FAM	NFQ-MGB	25.9468	25.951	0.021746				TRUE	0.239677	TRUE	3	20	67.4172				N
A3	Sample 1	Target 1	UNKNOWN	FAM	NFQ-MGB	25.9317	25.951	0.021746				TRUE	0.239677	TRUE	3	20	66.3724				N
A4	Sample 2	Target 1	UNKNOWN	FAM	NFQ-MGB	25.72	25.5941	0.119008				TRUE	0.239677	TRUE	3	20	71.8886				N
A5	Sample 2	Target 1	UNKNOWN	FAM	NFQ-MGB	25.4834	25.5941	0.119008				TRUE	0.239677	TRUE	3	20	65.7737				N
A6	Sample 2	Target 1	UNKNOWN	FAM	NFQ-MGB	25.5789	25.5941	0.119008				TRUE	0.239677	TRUE	3	20	68.0099				N
A7	Sample 1	Target 9	UNKNOWN	SYBR	None	24.4621	24.4564	0.0184617				TRUE	0.782463	TRUE	3	16	79.339				N
A8	Sample 1	Target 9	UNKNOWN	SYBR	None	24.4358	24.4564	0.0184617				TRUE	0.782463	TRUE	3	16	79.339				N
A9	Sample 1	Target 9	UNKNOWN	SYBR	None	24.4714	24.4564	0.0184617				TRUE	0.782463	TRUE	3	16	79.3416				N
A10	Sample 2	Target 9	UNKNOWN	SYBR	None	24.7148	24.7867	0.109145				TRUE	0.782463	TRUE	3	17	79.3416				N
A11	Sample 2	Target 9	UNKNOWN	SYBR	None	24.7331	24.7867	0.109145				TRUE	0.782463	TRUE	3	16	79.1863				N
A12	Sample 2	Target 9	UNKNOWN	SYBR	None	24.9123	24.7867	0.109145				TRUE	0.782463	TRUE	3	17	79.1863				N
B1	Sample 1	Target 2	UNKNOWN	FAM	NFQ-MGB	25.7457	25.7274	0.0233144				TRUE	0.067795	TRUE	3	22	69.5041				N
B2	Sample 1	Target 2	UNKNOWN	FAM	NFQ-MGB	25.7011	25.7274	0.0233144				TRUE	0.067795	TRUE	3	22	67.2682				N
B3	Sample 1	Target 2	UNKNOWN	FAM	NFQ-MGB	25.7353	25.7274	0.0233144				TRUE	0.067795	TRUE	3	22	70.2486				N
B4	Sample 2	Target 2	UNKNOWN	FAM	NFQ-MGB	25.9933	25.9211	0.0646533				TRUE	0.067795	TRUE	3	22	71.5904				N
B5	Sample 2	Target 2	UNKNOWN	FAM	NFQ-MGB	25.9015	25.9211	0.0646533				TRUE	0.067795	TRUE	3	22	72.9296				N
B6	Sample 2	Target 2	UNKNOWN	FAM	NFQ-MGB	25.8685	25.9211	0.0646533				TRUE	0.067795	TRUE	3	22	71.2897				N
B7	Sample 1	Target 10	UNKNOWN	SYBR	None	25.8957	25.8375	0.0554894				TRUE	1.20486	TRUE	3	18	78.8917				N
B8	Sample 1	Target 10	UNKNOWN	SYBR	None	25.7853	25.8375	0.0554894				TRUE	1.20486	TRUE	3	17	79.0408				N
B9	Sample 1	Target 10	UNKNOWN	SYBR	None	25.8314	25.8375	0.0554894				TRUE	1.20486	TRUE	3	18	78.8944				N
B10	Sample 2	Target 10	UNKNOWN	SYBR	None	25.9281	25.9268	0.00562675				TRUE	1.20486	TRUE	3	18	78.8944				N
B11	Sample 2	Target 10	UNKNOWN	SYBR	None	25.9206	25.9268	0.00562675				TRUE	1.20486	TRUE	3	18	78.7389				N
B12	Sample 2	Target 10	UNKNOWN	SYBR	None	25.9316	25.9268	0.00562675				TRUE	1.20486	TRUE	3	17	78.7389				N
C1	Sample 1	Target 3	UNKNOWN	FAM	NFQ-MGB	26.977	26.9978	0.0572004				TRUE	0.276666	TRUE	3	21	73.2305				N
C2	Sample 1	Target 3	UNKNOWN	FAM	NFQ-MGB	26.9539	26.9978	0.0572004				TRUE	0.276666	TRUE	3	21	76.2117				N
C3	Sample 1	Target 3	UNKNOWN	FAM	NFQ-MGB	27.0625	26.9978	0.0572004				TRUE	0.276666	TRUE	3	21	77.4048				N
C4	Sample 2	Target 3	UNKNOWN	FAM	NFQ-MGB	27.1562	27.1095	0.044019				TRUE	0.276666	TRUE	3	21	74.423				N
C5	Sample 2	Target 3	UNKNOWN	FAM	NFQ-MGB	27.1033	27.1095	0.044019				TRUE	0.276666	TRUE	3	21	76.0603				N
C6	Sample 2	Target 3	UNKNOWN	FAM	NFQ-MGB	27.0688	27.1095	0.044019				TRUE	0.276666	TRUE	3	21	76.0603				N
C7	Sample 1	Target 11	UNKNOWN	SYBR	None	30.012	29.9333	0.0763249				TRUE	0.870692	TRUE	3	22	80.9791				N
C8	Sample 1	Target 11	UNKNOWN	SYBR	None	29.9283	29.9333	0.0763249				TRUE	0.870692	TRUE	3	22	80.9791				N
C9	Sample 1	Target 11	UNKNOWN	SYBR	None	29.8596	29.9333	0.0763249				TRUE	0.870692	TRUE	3	22	80.9815				N
C10	Sample 2	Target 11	UNKNOWN	SYBR	None	30.0698	30.0499	0.0569564				TRUE	0.870692	TRUE	3	22	80.9815				N
C11	Sample 2	Target 11	UNKNOWN	SYBR	None	29.9857	30.0499	0.0569564				TRUE	0.870692	TRUE	3	23	80.8267				N
C12	Sample 2	Target 11	UNKNOWN	SYBR	None	30.0942	30.0499	0.0569564				TRUE	0.870692	TRUE	3	22	80.8267				N
D1	Sample 1	Target 4	UNKNOWN	SYBR	None	29.7121	29.6144	0.103752				TRUE	0.932142	TRUE	3	21	80.3853				N
D2	Sample 1	Target 4	UNKNOWN	SYBR	None	29.6257	29.6144	0.103752				TRUE	0.932142	TRUE	3	21	80.3853				N
D3	Sample 1	Target 4	UNKNOWN	SYBR	None	29.5055	29.6144	0.103752				TRUE	0.932142	TRUE	3	21	80.5356				N
D4	Sample 2	Target 4	UNKNOWN	SYBR	None	29.9198	29.7626	0.136174				TRUE	0.932142	TRUE	3	22	80.5356				N
D5	Sample 2	Target 4	UNKNOWN	SYBR	None	29.6827	29.7626	0.136174				TRUE	0.932142	TRUE	3	21	80.3837				N
D6	Sample 2	Target 4	UNKNOWN	SYBR	None	29.6853	29.7626	0.136174				TRUE	0.932142	TRUE	3	22	80.3837				N
D7	Sample 1	Target 12	UNKNOWN	SYBR	None	24.8426	24.8381	0.135964				TRUE	0.466052	TRUE	3	18	80.5318	64.1307			Y
D8	Sample 1	Target 12	UNKNOWN	SYBR	None	24.7	24.8381	0.135964				TRUE	0.466052	TRUE	3	18	80.5318				N
D9	Sample 1	Target 12	UNKNOWN	SYBR	None	24.9718	24.8381	0.135964				TRUE	0.466052	TRUE	3	18	80.3852	65.179			Y
D10	Sample 2	Target 12	UNKNOWN	SYBR	None	24.6333	24.6569	0.0505243				TRUE	0.466052	TRUE	3	18	80.5343				N
D11	Sample 2	Target 12	UNKNOWN	SYBR	None	24.6225	24.6569	0.0505243				TRUE	0.466052	TRUE	3	17	80.5284				N
D12	Sample 2	Target 12	UNKNOWN	SYBR	None	24.7149	24.6569	0.0505243				TRUE	0.466052	TRUE	3	18	80.5284				N
E1	Sample 1	Target 5	UNKNOWN	SYBR	None	24.9273	24.8744	0.045842				TRUE	0.777247	TRUE	3	18	83.2175				N
E2	Sample 1	Target 5	UNKNOWN	SYBR	None	24.8453	24.8744	0.045842				TRUE	0.777247	TRUE	3	16	83.2175				N
E3	Sample 1	Target 5	UNKNOWN	SYBR	None	24.8507	24.8744	0.045842				TRUE	0.777247	TRUE	3	17	83.3682				N
E4	Sample 2	Target 5	UNKNOWN	SYBR	None	24.774	24.709	0.0619869				TRUE	0.777247	TRUE	3	17	83.3682				N
E5	Sample 2	Target 5	UNKNOWN	SYBR	None	24.7024	24.709	0.0619869				TRUE	0.777247	TRUE	3	17	83.2163				N
E6	Sample 2	Target 5	UNKNOWN	SYBR	None	24.6506	24.709	0.0619869				TRUE	0.777247	TRUE	3	17	83.2163				N
E7	Sample 1	Target 13	UNKNOWN	SYBR	None	24.9058	24.9075	0.00240803				TRUE	1.12254	TRUE	3	16	76.9534				N
E8	Sample 1	Target 13	UNKNOWN	SYBR	None	24.9065	24.9075	0.00240803				TRUE	1.12254	TRUE	3	16	76.9534				N
E9	Sample 1	Target 13	UNKNOWN	SYBR	None	24.9103	24.9075	0.00240803				TRUE	1.12254	TRUE	3	16	76.9563				N
E10	Sample 2	Target 13	UNKNOWN	SYBR	None	24.8235	24.8092	0.0219604				TRUE	1.12254	TRUE	3	15	76.9563				N
E11	Sample 2	Target 13	UNKNOWN	SYBR	None	24.8203	24.8092	0.0219604				TRUE	1.12254	TRUE	3	16	76.9494				N
E12	Sample 2	Target 13	UNKNOWN	SYBR	None	24.784	24.8092	0.0219604				TRUE	1.12254	TRUE	3	16	76.9494				N
F1	Sample 1	Target 6	UNKNOWN	SYBR	None	25.9331	25.9307	0.00848431				TRUE	1.31314	TRUE	3	17	77.4042				N
F2	Sample 1	Target 6	UNKNOWN	SYBR	None	25.9377	25.9307	0.00848431				TRUE	1.31314	TRUE	3	17	77.4042				N
F3	Sample 1	Target 6	UNKNOWN	SYBR	None	25.9213	25.9307	0.00848431				TRUE	1.31314	TRUE	3	17	77.4048				N
F4	Sample 2	Target 6	UNKNOWN	SYBR	None	25.8171	25.7482	0.0684913				TRUE	1.31314	TRUE	3	17	77.5539				N
F5	Sample 2	Target 6	UNKNOWN	SYBR	None	25.7474	25.7482	0.0684913				TRUE	1.31314	TRUE	3	17	77.4021				N
F6	Sample 2	Target 6	UNKNOWN	SYBR	None	25.6801	25.7482	0.0684913				TRUE	1.31314	TRUE	3	17	77.4021				N
F7	Sample 1	Target 14	UNKNOWN	SYBR	None	22.7844	22.7826	0.0517648				TRUE	0.416861	TRUE	3	15	81.7246				N
F8	Sample 1	Target 14	UNKNOWN	SYBR	None	22.7299	22.7826	0.0517648				TRUE	0.416861	TRUE	3	16	81.7246				N
F9	Sample 1	Target 14	UNKNOWN	SYBR	None	22.8334	22.7826	0.0517648				TRUE	0.416861	TRUE	3	16	81.876	66.0735			Y
F10	Sample 2	Target 14	UNKNOWN	SYBR	None	22.9287	22.9089	0.0177303				TRUE	0.416861	TRUE	3	16	81.876	66.2226			Y
F11	Sample 2	Target 14	UNKNOWN	SYBR	None	22.8945	22.9089	0.0177303				TRUE	0.416861	TRUE	3	16	81.7214				N
F12	Sample 2	Target 14	UNKNOWN	SYBR	None	22.9034	22.9089	0.0177303				TRUE	0.416861	TRUE	3	16	81.7214				N
G1	Sample 1	Target 7	UNKNOWN	SYBR	None	23.1487	23.3899	0.452929				TRUE	0.565977	TRUE	3	16	82.174				N
G2	Sample 1	Target 7	UNKNOWN	SYBR	None	23.1086	23.3899	0.452929				TRUE	0.565977	TRUE	3	16	82.174				N
G3	Sample 1	Target 7	UNKNOWN	SYBR	None	23.9124	23.3899	0.452929				TRUE	0.565977	TRUE	3	17	82.1755				N
G4	Sample 2	Target 7	UNKNOWN	SYBR	None	23.1803	23.1851	0.0592468				TRUE	0.565977	TRUE	3	16	82.1755				N
G5	Sample 2	Target 7	UNKNOWN	SYBR	None	23.2467	23.1851	0.0592468				TRUE	0.565977	TRUE	3	16	82.1727				N
G6	Sample 2	Target 7	UNKNOWN	SYBR	None	23.1285	23.1851	0.0592468				TRUE	0.565977	TRUE	3	16	82.1727				N
G7	Sample 1	Target 15	UNKNOWN	SYBR	None	24.8204	24.7835	0.0321167				TRUE	0.599391	TRUE	3	17	79.6372				N
G8	Sample 1	Target 15	UNKNOWN	SYBR	None	24.7617	24.7835	0.0321167				TRUE	0.599391	TRUE	3	17	79.6372				N
G9	Sample 1	Target 15	UNKNOWN	SYBR	None	24.7684	24.7835	0.0321167				TRUE	0.599391	TRUE	3	18	79.7889				N
G10	Sample 2	Target 15	UNKNOWN	SYBR	None	24.9511	24.9399	0.0164451				TRUE	0.599391	TRUE	3	18	79.7889				N
G11	Sample 2	Target 15	UNKNOWN	SYBR	None	24.9211	24.9399	0.0164451				TRUE	0.599391	TRUE	3	18	79.7828				N
G12	Sample 2	Target 15	UNKNOWN	SYBR	None	24.9476	24.9399	0.0164451				TRUE	0.599391	TRUE	3	18	79.7828				N
H1	Sample 1	Target 8	UNKNOWN	SYBR	None	24.959	24.5728	0.335398				TRUE	1.13516	TRUE	3	17	76.8079				N
H2	Sample 1	Target 8	UNKNOWN	SYBR	None	24.3548	24.5728	0.335398				TRUE	1.13516	TRUE	3	16	76.8079				N
H3	Sample 1	Target 8	UNKNOWN	SYBR	None	24.4045	24.5728	0.335398				TRUE	1.13516	TRUE	3	16	76.9575				N
H4	Sample 2	Target 8	UNKNOWN	SYBR	None	24.1933	24.1791	0.0235146				TRUE	1.13516	TRUE	3	16	76.9575				N
H5	Sample 2	Target 8	UNKNOWN	SYBR	None	24.1921	24.1791	0.0235146				TRUE	1.13516	TRUE	3	16	76.9548				N
H6	Sample 2	Target 8	UNKNOWN	SYBR	None	24.152	24.1791	0.0235146				TRUE	1.13516	TRUE	3	15	76.9548				N
H7	Sample 1	Target 16	UNKNOWN	SYBR	None	22.7898	22.8028	0.0115424				TRUE	0.511385	TRUE	3	16	82.0228	65.4726			Y
H8	Sample 1	Target 16	UNKNOWN	SYBR	None	22.8063	22.8028	0.0115424				TRUE	0.511385	TRUE	3	16	82.0228				N
H9	Sample 1	Target 16	UNKNOWN	SYBR	None	22.8121	22.8028	0.0115424				TRUE	0.511385	TRUE	3	16	82.1741	66.0735			Y
H10	Sample 2	Target 16	UNKNOWN	SYBR	None	22.8412	22.8633	0.0379796				TRUE	0.511385	TRUE	3	16	82.1741				N
H11	Sample 2	Target 16	UNKNOWN	SYBR	None	22.8416	22.8633	0.0379796				TRUE	0.511385	TRUE	3	15	82.1688				N
H12	Sample 2	Target 16	UNKNOWN	SYBR	None	22.9072	22.8633	0.0379796				TRUE	0.511385	TRUE	3	15	82.1688				N

## Sheet: 18S
Msx1
Well	Cт	18S	dCt	ddCt	2^(-ddCt)	Average	STE	STD	Ttest
A1	25.9746	18.9057	7.06883	0	1	0.940956	0.0972404	0.119095	0.133104	CON	1	0.103342
A2	25.9468	18.5631	7.38378	0.314957	0.803875					MUT	1.19132	0.0992845
A3	25.9317	18.89	7.04168	-0.0271435	1.01899
A4	25.72	18.9766	6.74335	-0.325472	1.25307	1.12098	0.0934223	0.114419
A5	25.4834	18.4949	6.98851	-0.0803204	1.05725
A6	25.5789	18.5841	6.99484	-0.0739841	1.05262
			0								Normalize
Lhx9			0								Average	STE
A7	24.4621	18.9057	5.55636	0	1	0.928636	0.0890493	0.109063	0.029354	CON	1	0.0958927
A8	24.4358	18.5631	5.87272	0.316362	0.803092					MUT	0.650978	0.0203144
A9	24.4714	18.89	5.58137	0.0250092	0.982814
A10	24.7148	18.9766	5.73821	0.181845	0.881575	0.604521	0.0188647	0.0266787
A11	24.7331	18.4949	6.23816	0.681803	0.623386
A12	24.9123	18.5841	6.32824	0.771873	0.585656
			0								Normalize
Emx1			0								Average	STE
B1	25.7457	18.9057	6.83997	0	1	0.93653	0.0871442	0.106729	0.0677055	CON	1	0.0930501
B2	25.7011	18.5631	7.1381	0.298126	0.813308					MUT	0.816766	0.0941201
B3	25.7353	18.89	6.84534	0.00537491	0.996281
B4	25.9933	18.9766	7.01667	0.176699	0.884725	0.764925	0.0881463	0.107957
B5	25.9015	18.4949	7.40662	0.566652	0.675182
B6	25.8685	18.5841	7.28441	0.444441	0.734869
			0								Normalize
Dbx1			0								Average	STE
B7	25.8957	18.9057	6.99002	0	1	0.96186	0.0793916	0.0972345	0.298362	CON	1	0.0825397
B8	25.7853	18.5631	7.22221	0.232197	0.851338					MUT	0.882634	0.13209
B9	25.8314	18.89	6.94144	-0.0485744	1.03424
B10	25.9281	18.9766	6.95148	-0.0385361	1.02707	0.848971	0.127052	0.155607
B11	25.9206	18.4949	7.42571	0.435694	0.739338
B12	25.9316	18.5841	7.34754	0.357525	0.780502
			0								Normalize
dlx5			0								Average	STE
C1	26.977	18.9057	8.07129	0	1	0.911194	0.0824658	0.101	0.0933846	CON	1	0.090503
C2	26.9539	18.5631	8.39083	0.319544	0.801323					MUT	0.866119	0.11094
C3	27.0625	18.89	8.17249	0.101198	0.932258
C4	27.1562	18.9766	8.17963	0.108339	0.927655	0.789202	0.101088	0.123807
C5	27.1033	18.4949	8.60843	0.537142	0.689135
C6	27.0688	18.5841	8.48476	0.413469	0.750816
			0								Normalize
Nkix6.2			0								Average	STE
C7	30.012	18.9057	11.1063	0	1	0.97834	0.108742	0.133181	0.334678	CON	1	0.111149
C8	29.9283	18.5631	11.3653	0.259018	0.835657					MUT	0.862324	0.119653
C9	29.8596	18.89	10.9696	-0.136667	1.09936
C10	30.0698	18.9766	11.0932	-0.0130558	1.00909	0.843646	0.117061	0.14337
C11	29.9857	18.4949	11.4908	0.384518	0.766035
C12	30.0942	18.5841	11.5102	0.4039	0.755812
			0								Normalize
Fgf3			0								Average	STE
D1	29.7121	18.9057	10.8063	0	1	0.992887	0.124291	0.152225	0.187639	CON	1	0.125181
D2	29.6257	18.5631	11.0626	0.256302	0.837231					MUT	0.836709	0.0593622
D3	29.5055	18.89	10.6155	-0.190844	1.14143
D4	29.9198	18.9766	10.9432	0.136902	0.90947	0.830757	0.05894	0.0721864
D5	29.6827	18.4949	11.1878	0.381479	0.76765
D6	29.6853	18.5841	11.1012	0.294859	0.815152
			0								Normalize
Sema3f			0								Average	STE
D7	24.8426	18.9057	5.93684	0	1	0.924947	0.0548456	0.0671719	0.493757	CON	1	0.059296
D8	24.7	18.5631	6.13697	0.200134	0.87047					MUT	1.06842	0.172861
D9	24.9718	18.89	6.08185	0.145014	0.904371
D10	24.6333	18.9766	5.65666	-0.28018	1.21435	0.988235	0.159887	0.195821
D11	24.6225	18.4949	6.12758	0.190742	0.876155
D12	24.7149	18.5841	6.13079	0.193958	0.874204
			0								Normalize
Otx1			0								Average	STE
E1	24.9273	18.9057	6.02153	0	1	0.959247	0.0898361	0.110026	0.576051	CON	1	0.0936528
E2	24.8453	18.5631	6.28228	0.260742	0.834658					MUT	1.04818	0.125856
E3	24.8507	18.89	5.96068	-0.060854	1.04308
E4	24.774	18.9766	5.79743	-0.2241	1.16805	1.00546	0.120727	0.14786
E5	24.7024	18.4949	6.20754	0.186005	0.879037
E6	24.6506	18.5841	6.06651	0.0449753	0.969306
			0								Normalize
Rest			0								Average	STE
E7	24.9058	18.9057	6.00007	0	1	0.924763	0.0967311	0.118471	0.97663	CON	1	0.104601
E8	24.9065	18.5631	6.34344	0.343365	0.788201					MUT	1.00235	0.145106
E9	24.9103	18.89	6.02028	0.0202103	0.986089
E10	24.8235	18.9766	5.84688	-0.153193	1.11203	0.926938	0.134188	0.164347
E11	24.8203	18.4949	6.32541	0.325333	0.798114
E12	24.784	18.5841	6.19987	0.1998	0.870671
			0								Normalize
Sema3a			0								Average	STE
F1	25.9331	18.9057	7.02737	0	1	0.927787	0.100222	0.122746	0.642564	CON	1	0.108022
F2	25.9377	18.5631	7.37465	0.347288	0.78606					MUT	1.05892	0.12639
F3	25.9213	18.89	7.03127	0.00390053	0.9973
F4	25.8171	18.9766	6.84045	-0.186916	1.13833	0.982454	0.117263	0.143617
F5	25.7474	18.4949	7.25254	0.225174	0.855492
F6	25.6801	18.5841	7.096	0.0686302	0.953543
			0								Normalize
Dlx1			0								Average	STE
F7	22.7844	18.9057	3.8787	0	1	0.925014	0.0771264	0.0944602	0.0628761	CON	1	0.0833786
F8	22.7299	18.5631	4.1669	0.288198	0.818924					MUT	0.774975	0.0215581
F9	22.8334	18.89	3.94344	0.0647392	0.956118
F10	22.9287	18.9766	3.9521	0.0733986	0.950396	0.716862	0.0199416	0.0282016
F11	22.8945	18.4949	4.39963	0.520933	0.696921
F12	22.9034	18.5841	4.31935	0.440647	0.736804
			0								Normalize
Dlx2			0								Average	STE
G1	23.1487	18.9057	4.24299	0	1	0.797803	0.170649	0.209002	0.663194	CON	1	0.213899
G2	23.1086	18.5631	4.54556	0.302574	0.810804					MUT	1.06205	0.169226
G3	23.9124	18.89	5.0224	0.779413	0.582604
G4	23.1803	18.9766	4.20366	-0.0393295	1.02764	0.847304	0.135009	0.165351
G5	23.2467	18.4949	4.75178	0.508787	0.702813
G6	23.1285	18.5841	4.54439	0.301405	0.811462
			0								Normalize
Lhx7			0								Average	STE
G7	24.8204	18.9057	5.91465	0	1	0.948919	0.090844	0.111261	0.0696262	CON	1	0.0957343
G8	24.7617	18.5631	6.19868	0.284037	0.82129					MUT	0.755651	0.0164039
G9	24.7684	18.89	5.87837	-0.0362797	1.02547
G10	24.9511	18.9766	5.97454	0.0598946	0.959334	0.717052	0.015566	0.0220136
G11	24.9211	18.4949	6.42616	0.511515	0.701486
G12	24.9476	18.5841	6.36351	0.448868	0.732618
			0								Normalize
Ephrin5a			0								Average	STE
H1	24.959	18.9057	6.05325	0	1	1.21714	0.185271	0.22691	0.406292	CON	1	0.152218
H2	24.3548	18.5631	5.79174	-0.261503	1.19873					MUT	1.22296	0.177313
H3	24.4045	18.89	5.51451	-0.538734	1.4527
H4	24.1933	18.9766	5.21671	-0.836536	1.78576	1.48852	0.215815	0.264318
H5	24.1921	18.4949	5.69722	-0.356024	1.27989
H6	24.152	18.5841	5.56792	-0.485329	1.3999
			0								Normalize
Sfrp2			0								Average	STE
H7	22.7898	18.9057	3.88411	0	1	0.917877	0.098346	0.120449	0.130044	CON	1	0.107145
H8	22.8063	18.5631	4.2433	0.359184	0.779605					MUT	0.797128	0.00652589
H9	22.8121	18.89	3.92208	0.0379696	0.974025
H10	22.8412	18.9766	3.86458	-0.019537	1.01363	0.731665	0.00598996	0.00847109
H11	22.8416	18.4949	4.34672	0.462605	0.725675
H12	22.9072	18.5841	4.3231	0.438982	0.737655

## Sheet: PPIA
Msx1
Well	Cт	PPIA	dCt	ddCt	2^(-ddCt)	Average	STE	STD	Ttest (2,2)
A1	25.9746	20.9705	5.00409	0	1	0.968299	0.0254191	0.0311319	0.0621221	CON	1	0.0262513
A2	25.9468	20.85	5.09679	0.0926952	0.937769					MUT	1.1624	0.0855007
A3	25.9317	20.8794	5.05231	0.0482197	0.967129
A4	25.72	20.7949	4.92505	-0.0790443	1.05632	1.12555	0.0827903	0.101397
A5	25.4834	20.7919	4.6915	-0.312592	1.24194
A6	25.5789	20.6837	4.89521	-0.108883	1.07839
			0								Normalize
Lhx9			0								Average	STE
A7	24.4621	20.9705	3.49163	0	1	0.956549	0.030769	0.0376842	0.00651005	CON	1	0.0321666
A8	24.4358	20.85	3.58573	0.094101	0.936856					MUT	0.723234	0.0680291
A9	24.4714	20.8794	3.592	0.100372	0.932792
A10	24.7148	20.7949	3.9199	0.428272	0.743151	0.691809	0.0650732	0.0796981
A11	24.7331	20.7919	3.94116	0.449532	0.732281
A12	24.9123	20.6837	4.2286	0.736975	0.599996
			0								Normalize
Emx1			0								Average	STE
B1	25.7457	20.9705	4.77524	0	1	0.964782	0.0249369	0.0305413	0.000944399	CON	1	0.0258472
B2	25.7011	20.85	4.8511	0.0758648	0.948773					MUT	0.791817	0.0216035
B3	25.7353	20.8794	4.85597	0.0807381	0.945574
B4	25.9933	20.7949	5.19836	0.423126	0.745807	0.763931	0.0208427	0.025527
B5	25.9015	20.7919	5.10962	0.334381	0.793124
B6	25.8685	20.6837	5.18478	0.409542	0.752862
			0								Normalize
Dbx1			0								Average	STE
B7	25.8957	20.9705	4.92528	0	1	0.99158	0.00759089	0.0092969	0.00315793	CON	1	0.00765535
B8	25.7853	20.85	4.93522	0.00993538	0.993137					MUT	0.851806	0.0321241
B9	25.8314	20.8794	4.95207	0.0267887	0.981603
B10	25.9281	20.7949	5.13317	0.207891	0.865802	0.844634	0.0318536	0.0390126
B11	25.9206	20.7919	5.1287	0.203423	0.868488
B12	25.9316	20.6837	5.24791	0.322626	0.799613
			0								Normalize
dlx5			0								Average	STE
C1	26.977	20.9705	6.00656	0	1	0.939867	0.0471631	0.0577627	0.0124457	CON	1	0.0501806
C2	26.9539	20.85	6.10384	0.0972824	0.934792					MUT	0.83725	0.0178967
C3	27.0625	20.8794	6.18312	0.176561	0.884809
C4	27.1562	20.7949	6.36132	0.354767	0.781996	0.786903	0.0168205	0.0206009
C5	27.1033	20.7919	6.31143	0.304871	0.809515
C6	27.0688	20.6837	6.38513	0.378571	0.769199
			0								Normalize
Nkx6.2			0								Average	STE
C7	30.012	20.9705	9.04152	0	1	1.00608	0.02832	0.0346847	0.0168284	CON	1	0.0281487
C8	29.9283	20.85	9.07828	0.0367565	0.974844					MUT	0.836514	0.0513322
C9	29.8596	20.8794	8.98022	-0.0613041	1.04341
C10	30.0698	20.7949	9.2749	0.233372	0.850645	0.841604	0.0516446	0.0632514
C11	29.9857	20.7919	9.19377	0.152246	0.899848
C12	30.0942	20.6837	9.41053	0.369001	0.774318
			0								Normalize
Fgf3			0								Average	STE
D1	29.7121	20.9705	8.74159	0	1	1.02001	0.0457819	0.0560711	0.0215788	CON	1	0.0448839
D2	29.6257	20.85	8.77563	0.0340405	0.976681					MUT	0.81814	0.0540658
D3	29.5055	20.8794	8.62611	-0.11548	1.08334
D4	29.9198	20.7949	9.12492	0.383329	0.766666	0.834508	0.0551474	0.0675415
D5	29.6827	20.7919	8.89079	0.149208	0.901745
D6	29.6853	20.6837	9.00155	0.25996	0.835111
			0								Normalize
Sema3f			0								Average	STE
D7	24.8426	20.9705	3.8721	0	1	0.957932	0.0707037	0.0865939	0.726592	CON	1	0.0738086
D8	24.7	20.85	3.84998	-0.0221272	1.01546					MUT	1.02599	0.0644248
D9	24.9718	20.8794	4.09248	0.220377	0.858341
D10	24.6333	20.7949	3.83835	-0.0337524	1.02367	0.982828	0.0617146	0.0755847
D11	24.6225	20.7919	3.83057	-0.0415287	1.0292
D12	24.7149	20.6837	4.03116	0.15906	0.895609
			0								Normalize
Otx1			0								Average	STE
E1	24.9273	20.9705	3.9568	0	1	0.987891	0.0108475	0.0132855	0.403787	CON	1	0.0109805
E2	24.8453	20.85	3.99528	0.0384808	0.97368					MUT	1.01572	0.0211622
E3	24.8507	20.8794	3.97131	0.0145092	0.989993
E4	24.774	20.7949	3.97913	0.0223274	0.984643	1.00342	0.0209059	0.0256044
E5	24.7024	20.7919	3.91053	-0.0462666	1.03259
E6	24.6506	20.6837	3.96688	0.0100765	0.99304
			0								Normalize
Rest			0								Average	STE
E7	24.9058	20.9705	3.93534	0	1	0.951795	0.0347388	0.0425462	0.364846	CON	1	0.0364982
E8	24.9065	20.85	4.05644	0.121103	0.919484					MUT	0.969025	0.0225281
E9	24.9103	20.8794	4.03091	0.0955734	0.9359
E10	24.8235	20.7949	4.02857	0.093235	0.937418	0.922313	0.0214421	0.0262611
E11	24.8203	20.7919	4.0284	0.0930614	0.937531
E12	24.784	20.6837	4.10024	0.164902	0.891989
			0								Normalize
Sema3a			0								Average	STE
F1	25.9331	20.9705	4.96263	0	1	0.954509	0.0343551	0.0420762	0.400972	CON	1	0.0359924
F2	25.9377	20.85	5.08766	0.125027	0.916987					MUT	1.0272	0.0195737
F3	25.9213	20.8794	5.0419	0.0792637	0.946541
F4	25.8171	20.7949	5.02214	0.0595112	0.959589	0.98047	0.0186832	0.0228822
F5	25.7474	20.7919	4.95554	-0.00709724	1.00493
F6	25.6801	20.6837	4.99636	0.0337315	0.97689
			0								Normalize
Dlx1			0								Average	STE
F7	22.7844	20.9705	1.81396	0	1	0.95426	0.0377889	0.0462818	0.00771157	CON	1	0.0396003
F8	22.7299	20.85	1.8799	0.065937	0.955325					MUT	0.829499	0.0282149
F9	22.8334	20.8794	1.95407	0.140102	0.907455
F10	22.9287	20.7949	2.13379	0.319826	0.801166	0.791557	0.0269244	0.0329755
F11	22.8945	20.7919	2.10263	0.288662	0.818661
F12	22.9034	20.6837	2.21971	0.405748	0.754845
			0								Normalize
Dlx2			0								Average	STE
G1	23.1487	20.9705	2.17826	0	1	0.832935	0.199209	0.24398	0.956923	CON	1	0.239165
G2	23.1086	20.85	2.25857	0.0803127	0.945853					MUT	1.00976	0.02159
G3	23.9124	20.8794	3.03303	0.854776	0.552951
G4	23.1803	20.7949	2.38535	0.207098	0.866278	0.841064	0.0179831	0.0220247
G5	23.2467	20.7919	2.45477	0.276516	0.825582
G6	23.1285	20.6837	2.44476	0.266506	0.83133
			0								Normalize
Lhx7			0								Average	STE
G7	24.8204	20.9705	3.84991	0	1	0.977119	0.0173267	0.0212208	0.0020126	CON	1	0.0177324
G8	24.7617	20.85	3.91169	0.0617752	0.958084					MUT	0.813029	0.0323868
G9	24.7684	20.8794	3.889	0.0390835	0.973273
G10	24.9511	20.7949	4.15623	0.306322	0.808701	0.794426	0.0316457	0.038758
G11	24.9211	20.7919	4.12916	0.279243	0.824023
G12	24.9476	20.6837	4.26388	0.413969	0.750556
			0								Normalize
Ephrin5a			0								Average	STE
H1	24.959	20.9705	3.98851	0	1	1.25905	0.183351	0.224558	0.167328	CON	1	0.145626
H2	24.3548	20.85	3.50475	-0.483765	1.39839					MUT	1.17629	0.0263034
H3	24.4045	20.8794	3.52514	-0.463371	1.37876
H4	24.1933	20.7949	3.3984	-0.590109	1.50536	1.481	0.0331173	0.0405602
H5	24.1921	20.7919	3.40022	-0.588295	1.50347
H6	24.152	20.6837	3.46828	-0.520227	1.43418
			0								Normalize
Sfrp2			0								Average	STE
H7	22.7898	20.9705	1.81938	0	1	0.944636	0.0396241	0.0485295	0.0450217	CON	1	0.0419465
H8	22.8063	20.85	1.9563	0.136923	0.909457					MUT	0.868987	0.0487834
H9	22.8121	20.8794	1.93271	0.113333	0.92445
H10	22.8412	20.7949	2.04627	0.226891	0.854475	0.820876	0.0460825	0.0564393
H11	22.8416	20.7919	2.04971	0.230333	0.852438
H12	22.9072	20.6837	2.22346	0.404083	0.755716
