# Supplementary material for: The differentiation and integration of the hippocampal dorsoventral axis are controlled by two nuclear receptor genes
Source: eLife journal article supplement (doi:10.7554/elife.86940), 2023-05-10
Supplement: fig5-data3 [file ke20110629-1_data.xls]

## Sheet: Results
Block Type	96well
Chemistry	SYBR_GREEN
Experiment File Name	D:\Applied Biosystems\StepOne Software v2.1\experiments\KE\ke20110629-1.eds
Experiment Run End Time	2011-06-29 14:06:38 PM CDT
Instrument Type	steponeplus
Passive Reference	ROX
Well	Sample Name	Target Name	Task	Reporter	Quencher	Cт	Cт Mean	Cт SD	Quantity	Quantity Mean	Quantity SD	Automatic Ct Threshold	Ct Threshold	Automatic Baseline	Baseline Start	Baseline End	Tm1	Tm2	Tm3	Comments	HIGHSD	OUTLIERRG	MTP
A1	Sample 1	Target 1	UNKNOWN	FAM	NFQ-MGB	32.3359	32.0812	0.220641				TRUE	0.223202	TRUE	3	27	75.4728				N	Y	N
A2	Sample 1	Target 1	UNKNOWN	FAM	NFQ-MGB	31.9573	32.0812	0.220641				TRUE	0.223202	TRUE	3	26	79.0509				N	N	N
A3	Sample 1	Target 1	UNKNOWN	FAM	NFQ-MGB	31.9503	32.0812	0.220641				TRUE	0.223202	TRUE	3	26	78.8972				N	N	N
A4	Sample 2	Target 1	UNKNOWN	FAM	NFQ-MGB	31.7909	31.6075	0.161447				TRUE	0.223202	TRUE	3	26	73.8287				N	N	N
A5	Sample 2	Target 1	UNKNOWN	FAM	NFQ-MGB	31.4868	31.6075	0.161447				TRUE	0.223202	TRUE	3	26	73.0818				N	N	N
A6	Sample 2	Target 1	UNKNOWN	FAM	NFQ-MGB	31.5449	31.6075	0.161447				TRUE	0.223202	TRUE	3	26	74.8705				N	N	N
A7	Sample 1	Target 9	UNKNOWN	SYBR	None	23.9538	23.9307	0.0201172				TRUE	0.858457	TRUE	3	16	80.8388				N	N	N
A8	Sample 1	Target 9	UNKNOWN	SYBR	None	23.9174	23.9307	0.0201172				TRUE	0.858457	TRUE	3	16	80.8388				N	N	N
A9	Sample 1	Target 9	UNKNOWN	SYBR	None	23.9207	23.9307	0.0201172				TRUE	0.858457	TRUE	3	16	80.8407				N	N	N
A10	Sample 2	Target 9	UNKNOWN	SYBR	None	23.8681	23.9042	0.0530447				TRUE	0.858457	TRUE	3	16	80.8407				N	N	N
A11	Sample 2	Target 9	UNKNOWN	SYBR	None	23.8794	23.9042	0.0530447				TRUE	0.858457	TRUE	3	16	80.686				N	N	N
A12	Sample 2	Target 9	UNKNOWN	SYBR	None	23.9651	23.9042	0.0530447				TRUE	0.858457	TRUE	3	16	80.8351				N	N	N
B1	Sample 1	Target 2	UNKNOWN	FAM	NFQ-MGB	24.8322	24.8272	0.0242954				TRUE	0.128471	TRUE	3	20	78.6036				N	N	N
B2	Sample 1	Target 2	UNKNOWN	FAM	NFQ-MGB	24.8008	24.8272	0.0242954				TRUE	0.128471	TRUE	3	20	74.5782				N	N	N
B3	Sample 1	Target 2	UNKNOWN	FAM	NFQ-MGB	24.8486	24.8272	0.0242954				TRUE	0.128471	TRUE	3	20	73.2324				N	N	N
B4	Sample 2	Target 2	UNKNOWN	FAM	NFQ-MGB	24.9783	24.8483	0.112989				TRUE	0.128471	TRUE	3	20	73.8287				N	N	N
B5	Sample 2	Target 2	UNKNOWN	FAM	NFQ-MGB	24.7732	24.8483	0.112989				TRUE	0.128471	TRUE	3	20	75.6158				N	N	N
B6	Sample 2	Target 2	UNKNOWN	FAM	NFQ-MGB	24.7935	24.8483	0.112989				TRUE	0.128471	TRUE	3	20	74.1252				N	N	N
B7	Sample 1	Target 10	UNKNOWN	SYBR	None	22.7917	23.6193	0.716824				TRUE	0.829067	TRUE	3	14	80.0932				Y	Y	N
B8	Sample 1	Target 10	UNKNOWN	SYBR	None	24.0231	23.6193	0.716824				TRUE	0.829067	TRUE	3	16	79.6459				Y	N	N
B9	Sample 1	Target 10	UNKNOWN	SYBR	None	24.0431	23.6193	0.716824				TRUE	0.829067	TRUE	3	16	79.4989				Y	N	N
B10	Sample 2	Target 10	UNKNOWN	SYBR	None	23.9204	23.8681	0.0465547				TRUE	0.829067	TRUE	3	16	79.4989				N	N	N
B11	Sample 2	Target 10	UNKNOWN	SYBR	None	23.8313	23.8681	0.0465547				TRUE	0.829067	TRUE	3	16	79.4931				N	N	N
B12	Sample 2	Target 10	UNKNOWN	SYBR	None	23.8525	23.8681	0.0465547				TRUE	0.829067	TRUE	3	16	79.4931				N	N	N
C1	Sample 1	Target 3	UNKNOWN	FAM	NFQ-MGB	29.0025	28.9153	0.0965901				TRUE	0.0363136	TRUE	3	26	68.4656				N	N	N
C2	Sample 1	Target 3	UNKNOWN	FAM	NFQ-MGB	28.9318	28.9153	0.0965901				TRUE	0.0363136	TRUE	3	26	74.4291				N	N	N
C3	Sample 1	Target 3	UNKNOWN	FAM	NFQ-MGB	28.8115	28.9153	0.0965901				TRUE	0.0363136	TRUE	3	26	72.0398				N	N	N
C4	Sample 2	Target 3	UNKNOWN	FAM	NFQ-MGB	29.0939	29.0468	0.0901924				TRUE	0.0363136	TRUE	3	27	71.1454				N	N	N
C5	Sample 2	Target 3	UNKNOWN	FAM	NFQ-MGB	28.9428	29.0468	0.0901924				TRUE	0.0363136	TRUE	3	26	70.5478				N	N	N
C6	Sample 2	Target 3	UNKNOWN	FAM	NFQ-MGB	29.1036	29.0468	0.0901924				TRUE	0.0363136	TRUE	3	26	76.063				N	N	N
C7	Sample 1	Target 11	UNKNOWN	SYBR	None	24.9406	24.9474	0.0176869				TRUE	0.879369	TRUE	3	16	82.1808				N	N	N
C8	Sample 1	Target 11	UNKNOWN	SYBR	None	24.9674	24.9474	0.0176869				TRUE	0.879369	TRUE	3	17	82.1808				N	N	N
C9	Sample 1	Target 11	UNKNOWN	SYBR	None	24.934	24.9474	0.0176869				TRUE	0.879369	TRUE	3	16	82.1825				N	N	N
C10	Sample 2	Target 11	UNKNOWN	SYBR	None	24.9284	24.9435	0.0146683				TRUE	0.879369	TRUE	3	16	82.1825				N	N	N
C11	Sample 2	Target 11	UNKNOWN	SYBR	None	24.9443	24.9435	0.0146683				TRUE	0.879369	TRUE	3	17	82.0279				N	N	N
C12	Sample 2	Target 11	UNKNOWN	SYBR	None	24.9577	24.9435	0.0146683				TRUE	0.879369	TRUE	3	16	82.0279				N	N	N
D1	Sample 1	Target 4	UNKNOWN	SYBR	None	30.747	30.7672	0.0249776				TRUE	1.10245	TRUE	3	23	79.0509				N	N	N
D2	Sample 1	Target 4	UNKNOWN	SYBR	None	30.7951	30.7672	0.0249776				TRUE	1.10245	TRUE	3	23	79.0509				N	N	N
D3	Sample 1	Target 4	UNKNOWN	SYBR	None	30.7596	30.7672	0.0249776				TRUE	1.10245	TRUE	3	23	79.1954				N	N	N
D4	Sample 2	Target 4	UNKNOWN	SYBR	None	30.9303	30.9104	0.0199238				TRUE	1.10245	TRUE	3	22	79.1954				N	N	N
D5	Sample 2	Target 4	UNKNOWN	SYBR	None	30.9106	30.9104	0.0199238				TRUE	1.10245	TRUE	3	23	79.0442				N	N	N
D6	Sample 2	Target 4	UNKNOWN	SYBR	None	30.8904	30.9104	0.0199238				TRUE	1.10245	TRUE	3	22	79.0442				N	N	N
D7	Sample 1	Target 12	UNKNOWN	SYBR	None	22.9451	22.9333	0.0277865				TRUE	0.727861	TRUE	3	15	82.7773				N	N	N
D8	Sample 1	Target 12	UNKNOWN	SYBR	None	22.9532	22.9333	0.0277865				TRUE	0.727861	TRUE	3	15	82.7773				N	N	N
D9	Sample 1	Target 12	UNKNOWN	SYBR	None	22.9015	22.9333	0.0277865				TRUE	0.727861	TRUE	3	15	82.7789				N	N	N
D10	Sample 2	Target 12	UNKNOWN	SYBR	None	22.7725	22.7826	0.045841				TRUE	0.727861	TRUE	3	15	82.7789				N	N	N
D11	Sample 2	Target 12	UNKNOWN	SYBR	None	22.7426	22.7826	0.045841				TRUE	0.727861	TRUE	3	15	82.6243				N	N	N
D12	Sample 2	Target 12	UNKNOWN	SYBR	None	22.8326	22.7826	0.045841				TRUE	0.727861	TRUE	3	15	82.6243				N	N	N
E1	Sample 1	Target 5	UNKNOWN	SYBR	None	24.7733	24.8186	0.101841				TRUE	0.747738	TRUE	3	16	77.4109				N	N	N
E2	Sample 1	Target 5	UNKNOWN	SYBR	None	24.9352	24.8186	0.101841				TRUE	0.747738	TRUE	3	18	77.2618				N	N	N
E3	Sample 1	Target 5	UNKNOWN	SYBR	None	24.7473	24.8186	0.101841				TRUE	0.747738	TRUE	3	16	77.5556				N	N	N
E4	Sample 2	Target 5	UNKNOWN	SYBR	None	24.915	24.9367	0.027078				TRUE	0.747738	TRUE	3	17	77.4065				N	N	N
E5	Sample 2	Target 5	UNKNOWN	SYBR	None	24.9671	24.9367	0.027078				TRUE	0.747738	TRUE	3	17	77.4046				N	N	N
E6	Sample 2	Target 5	UNKNOWN	SYBR	None	24.9281	24.9367	0.027078				TRUE	0.747738	TRUE	3	16	77.4046				N	N	N
E7	Sample 1	Target 13	UNKNOWN	SYBR	None	36.9667	36.4193	0.69744				TRUE	0.355384	TRUE	3	31	72.7865	77.1109			Y	N	Y
E8	Sample 1	Target 13	UNKNOWN	SYBR	None	35.6341	36.4193	0.69744				TRUE	0.355384	TRUE	3	29	73.0848	84.5667			Y	N	Y
E9	Sample 1	Target 13	UNKNOWN	SYBR	None	36.6572	36.4193	0.69744				TRUE	0.355384	TRUE	3	30	72.939				Y	N	N
E10	Sample 2	Target 13	UNKNOWN	SYBR	None	36.4151	36.2916	0.268234				TRUE	0.355384	TRUE	3	30	73.2371	77.1135			N	N	Y
E11	Sample 2	Target 13	UNKNOWN	SYBR	None	35.9838	36.2916	0.268234				TRUE	0.355384	TRUE	3	29	81.1333	77.1075	72.6344		N	N	Y
E12	Sample 2	Target 13	UNKNOWN	SYBR	None	36.4757	36.2916	0.268234				TRUE	0.355384	TRUE	3	30	77.1075	72.7835			N	N	Y
F1	Sample 1	Target 6	UNKNOWN	SYBR	None	22.9492	22.8975	0.0452486				TRUE	0.995434	TRUE	3	15	82.3309				N	N	N
F2	Sample 1	Target 6	UNKNOWN	SYBR	None	22.878	22.8975	0.0452486				TRUE	0.995434	TRUE	3	14	82.3309				N	N	N
F3	Sample 1	Target 6	UNKNOWN	SYBR	None	22.8652	22.8975	0.0452486				TRUE	0.995434	TRUE	3	14	82.475				N	N	N
F4	Sample 2	Target 6	UNKNOWN	SYBR	None	22.9173	22.8938	0.0206378				TRUE	0.995434	TRUE	3	14	82.475				N	N	N
F5	Sample 2	Target 6	UNKNOWN	SYBR	None	22.8785	22.8938	0.0206378				TRUE	0.995434	TRUE	3	15	82.3236				N	N	N
F6	Sample 2	Target 6	UNKNOWN	SYBR	None	22.8856	22.8938	0.0206378				TRUE	0.995434	TRUE	3	15	82.3236				N	N	N
F7	Sample 1	Target 14	UNKNOWN	SYBR	None	27.471	27.5322	0.0581554				TRUE	1.06614	TRUE	3	19	85.014				N	N	N
F8	Sample 1	Target 14	UNKNOWN	SYBR	None	27.5391	27.5322	0.0581554				TRUE	1.06614	TRUE	3	19	85.014				N	N	N
F9	Sample 1	Target 14	UNKNOWN	SYBR	None	27.5867	27.5322	0.0581554				TRUE	1.06614	TRUE	3	19	85.0153				N	N	N
F10	Sample 2	Target 14	UNKNOWN	SYBR	None	27.6348	27.7014	0.193659				TRUE	1.06614	TRUE	3	19	85.0153				N	N	N
F11	Sample 2	Target 14	UNKNOWN	SYBR	None	27.5498	27.7014	0.193659				TRUE	1.06614	TRUE	3	19	85.0099				N	N	N
F12	Sample 2	Target 14	UNKNOWN	SYBR	None	27.9195	27.7014	0.193659				TRUE	1.06614	TRUE	3	20	85.0099				N	N	N
G1	Sample 1	Target 7	UNKNOWN	SYBR	None	24.9316	24.9241	0.0260143				TRUE	0.993747	TRUE	3	17	76.9637				N	N	N
G2	Sample 1	Target 7	UNKNOWN	SYBR	None	24.9454	24.9241	0.0260143				TRUE	0.993747	TRUE	3	17	76.9637				N	N	N
G3	Sample 1	Target 7	UNKNOWN	SYBR	None	24.8951	24.9241	0.0260143				TRUE	0.993747	TRUE	3	17	77.1083				N	N	N
G4	Sample 2	Target 7	UNKNOWN	SYBR	None	24.8762	24.9298	0.0464744				TRUE	0.993747	TRUE	3	16	77.1083				N	N	N
G5	Sample 2	Target 7	UNKNOWN	SYBR	None	24.9587	24.9298	0.0464744				TRUE	0.993747	TRUE	3	17	77.1064				N	N	N
G6	Sample 2	Target 7	UNKNOWN	SYBR	None	24.9545	24.9298	0.0464744				TRUE	0.993747	TRUE	3	17	77.1064				N	N	N
G7	Sample 1	Target 15	UNKNOWN	SYBR	None	24.9132	24.9071	0.0205413				TRUE	0.970156	TRUE	3	17	86.3561				N	N	N
G8	Sample 1	Target 15	UNKNOWN	SYBR	None	24.8842	24.9071	0.0205413				TRUE	0.970156	TRUE	3	17	86.3561				N	N	N
G9	Sample 1	Target 15	UNKNOWN	SYBR	None	24.9239	24.9071	0.0205413				TRUE	0.970156	TRUE	3	17	86.5062				N	N	N
G10	Sample 2	Target 15	UNKNOWN	SYBR	None	24.846	24.8674	0.0455177				TRUE	0.970156	TRUE	3	17	86.5062				N	N	N
G11	Sample 2	Target 15	UNKNOWN	SYBR	None	24.8366	24.8674	0.0455177				TRUE	0.970156	TRUE	3	17	86.3519				N	N	N
G12	Sample 2	Target 15	UNKNOWN	SYBR	None	24.9197	24.8674	0.0455177				TRUE	0.970156	TRUE	3	17	86.3519				N	N	N
H1	Sample 1	Target 8	UNKNOWN	SYBR	None	23.84	23.8615	0.058693				TRUE	0.270964	TRUE	3	17	78.4545				N	N	N
H2	Sample 1	Target 8	UNKNOWN	SYBR	None	23.8165	23.8615	0.058693				TRUE	0.270964	TRUE	3	18	78.4545				N	N	N
H3	Sample 1	Target 8	UNKNOWN	SYBR	None	23.9279	23.8615	0.058693				TRUE	0.270964	TRUE	3	18	78.45	66.0769			N	N	Y
H4	Sample 2	Target 8	UNKNOWN	SYBR	None	23.7772	23.7151	0.0758135				TRUE	0.270964	TRUE	3	18	78.45	66.0769			N	N	Y
H5	Sample 2	Target 8	UNKNOWN	SYBR	None	23.7373	23.7151	0.0758135				TRUE	0.270964	TRUE	3	17	78.597				N	N	N
H6	Sample 2	Target 8	UNKNOWN	SYBR	None	23.6306	23.7151	0.0758135				TRUE	0.270964	TRUE	3	17	78.597	65.3307			N	N	Y
H7	Sample 1	Target 16	UNKNOWN	SYBR	None	23.8084	23.8362	0.0651793				TRUE	0.821161	TRUE	3	16	87.2508				N	N	N
H8	Sample 1	Target 16	UNKNOWN	SYBR	None	23.7896	23.8362	0.0651793				TRUE	0.821161	TRUE	3	16	87.2508				N	N	N
H9	Sample 1	Target 16	UNKNOWN	SYBR	None	23.9107	23.8362	0.0651793				TRUE	0.821161	TRUE	3	16	87.4007				N	N	N
H10	Sample 2	Target 16	UNKNOWN	SYBR	None	23.7339	23.7594	0.0595199				TRUE	0.821161	TRUE	3	15	87.4007				N	N	N
H11	Sample 2	Target 16	UNKNOWN	SYBR	None	23.7168	23.7594	0.0595199				TRUE	0.821161	TRUE	3	16	87.3956				N	N	N
H12	Sample 2	Target 16	UNKNOWN	SYBR	None	23.8274	23.7594	0.0595199				TRUE	0.821161	TRUE	3	15	87.3956				N	N	N

## Sheet: PPIA
Wnt10b
Well	Cт	PPIA	dCt	ddCt	2^(-ddCt)	Average	STE	STD	Ttest
A1	32.3359	20.9705	11.3655	0	1	1.14082	0.100344	0.122896	0.0379698	CON	1	0.0879583
A2	31.9573	20.85	11.1072	-0.25823	1.19601					MUT	1.25699	0.107733
A3	31.9503	20.8794	11.071	-0.294476	1.22644
A4	31.7909	20.7949	10.996	-0.369459	1.29187	1.43399	0.122904	0.150526
A5	31.4868	20.7919	10.6949	-0.670574	1.59171
A6	31.5449	20.6837	10.8612	-0.504267	1.4184
			0								Normalize
Notch2			0								Average	STE
A7	23.9538	20.9705	2.98335	0	1	0.967996	0.0236902	0.0290145	0.20199	CON	1	0.0244735
A8	23.9174	20.85	3.06739	0.0840397	0.943412					MUT	0.924013	0.0593618
A9	23.9207	20.8794	3.04138	0.0580292	0.960575
A10	23.8681	20.7949	3.07316	0.0898132	0.939644	0.89444	0.057462	0.0703763
A11	23.8794	20.7919	3.08755	0.104198	0.930322
A12	23.9651	20.6837	3.28139	0.298042	0.813355
			0								Normalize
Hes5			0								Average	STE
B1	24.8322	20.9705	3.86176	0	1	0.956137	0.0313986	0.0384553	0.192238	CON	1	0.032839
B2	24.8008	20.85	3.95074	0.088974	0.940191					MUT	0.893431	0.0521486
B3	24.8486	20.8794	3.96923	0.107462	0.92822
B4	24.9783	20.7949	4.18335	0.321583	0.800191	0.854243	0.0498612	0.0610673
B5	24.7732	20.7919	3.9813	0.119532	0.920486
B6	24.7935	20.6837	4.10979	0.248022	0.84205
			0								Normalize
Notch3			0								Average	STE
B7	22.7917	20.9705	1.82119	0	1	0.393052	0.00127104	0.00179753	0.333124	CON	1	0.00323378
B8	24.0231	20.85	3.17307	1.35188	0.391781					MUT	1.04116	0.0390773
B9	24.0431	20.8794	3.16374	1.34255	0.394323
B10	23.9204	20.7949	3.12549	1.3043	0.404917	0.409228	0.0153594	0.0188113
B11	23.8313	20.7919	3.03938	1.21819	0.429821
B12	23.8525	20.6837	3.16878	1.3476	0.392946
			0								Normalize
Foxg1			0								Average	STE
C1	29.0025	20.9705	8.03207	0	1	1.01262	0.0440265	0.0539213	0.148646	CON	1	0.043478
C2	28.9318	20.85	8.08179	0.0497208	0.966123					MUT	0.828309	0.0633897
C3	28.8115	20.8794	7.93213	-0.0999393	1.07173
C4	29.0939	20.7949	8.29903	0.26696	0.831069	0.83876	0.0641895	0.0786157
C5	28.9428	20.7919	8.1509	0.118824	0.920938
C6	29.1036	20.6837	8.41992	0.387842	0.764272
			0								Normalize
Dll1			0								Average	STE
C7	24.9406	20.9705	3.97016	0	1	0.948698	0.0398018	0.0487471	0.122005	CON	1	0.0419542
C8	24.9674	20.85	4.11738	0.147221	0.902988					MUT	0.908056	0.0386053
C9	24.934	20.8794	4.05467	0.0845108	0.943104
C10	24.9284	20.7949	4.13346	0.163307	0.892976	0.861471	0.0366248	0.044856
C11	24.9443	20.7919	4.15242	0.182259	0.881322
C12	24.9577	20.6837	4.27396	0.303802	0.810114
			0								Normalize
Wnt1			0								Average	STE
D1	30.747	20.9705	9.7765	0	1	0.940102	0.045526	0.0557578	0.0414135	CON	1	0.0484267
D2	30.7951	20.85	9.9451	0.1686	0.889706					MUT	0.819327	0.0214971
D3	30.7596	20.8794	9.88027	0.103767	0.9306
D4	30.9303	20.7949	10.1354	0.358864	0.779778	0.770251	0.0202095	0.0247515
D5	30.9106	20.7919	10.1187	0.342226	0.788823
D6	30.8904	20.6837	10.2067	0.430214	0.742152
			0								Normalize
Hes1			0								Average	STE
D7	22.9451	20.9705	1.97464	0	1	0.960797	0.0351171	0.0430095	0.918029	CON	1	0.03655
D8	22.9532	20.85	2.10313	0.128485	0.914792					MUT	1.00643	0.0599548
D9	22.9015	20.8794	2.02216	0.0475178	0.9676
D10	22.7725	20.7949	1.97763	0.00298882	0.99793	0.966971	0.0576044	0.0705507
D11	22.7426	20.7919	1.95068	-0.0239639	1.01675
D12	22.8326	20.6837	2.14888	0.17424	0.886234
			0								Normalize
Ngn1			0								Average	STE
E1	24.7733	20.9705	3.80283	0	1	0.926044	0.0755743	0.0925592	0.100087	CON	1	0.0816098
E2	24.9352	20.85	4.08519	0.28236	0.822245					MUT	0.832008	0.0292377
E3	24.7473	20.8794	3.86792	0.0650864	0.955888
E4	24.915	20.7949	4.12014	0.317303	0.802569	0.770476	0.0270754	0.0331604
E5	24.9671	20.7919	4.17519	0.37236	0.772518
E6	24.9281	20.6837	4.24438	0.441551	0.736342
			0								Normalize
Pard3A			0								Average	STE
E7	36.9667	20.9705	15.9962	0	1	1.49347	0.586101	0.717825	0.74507	CON	1	0.392442
E8	35.6341	20.85	14.784	-1.21223	2.31696					MUT	0.93656	0.169333
E9	36.6572	20.8794	15.7778	-0.21843	1.16347
E10	36.4151	20.7949	15.6202	-0.376015	1.29775	1.39873	0.252895	0.309732
E11	35.9838	20.7919	15.1919	-0.80434	1.74635
E12	36.4757	20.6837	15.792	-0.204248	1.15209
			0								Normalize
Tcf4			0								Average	STE
F1	22.9492	20.9705	1.97876	0	1	0.987176	0.0147925	0.018117	0.0886586	CON	1	0.0149846
F2	22.878	20.85	2.028	0.0492325	0.96645					MUT	0.908303	0.0301093
F3	22.8652	20.8794	1.98588	0.00711823	0.995078
F4	22.9173	20.7949	2.12234	0.143581	0.905269	0.896655	0.0297231	0.0364033
F5	22.8785	20.7919	2.0866	0.107836	0.927979
F6	22.8856	20.6837	2.20187	0.223108	0.856718
			0								Normalize
Pard6a			0								Average	STE
F7	27.471	20.9705	6.50049	0	1	0.914642	0.0605248	0.0741274	0.125767	CON	1	0.0661732
F8	27.5391	20.85	6.68907	0.18858	0.877469					MUT	0.811838	0.111602
F9	27.5867	20.8794	6.70729	0.206802	0.866456
F10	27.6348	20.7949	6.83991	0.339418	0.79036	0.742541	0.102076	0.125016
F11	27.5498	20.7919	6.7579	0.257408	0.83659
F12	27.9195	20.6837	7.23584	0.735348	0.600673
			0								Normalize
Tbr2			0								Average	STE
G1	24.9316	20.9705	3.96115	0	1	0.958006	0.0364382	0.0446275	0.105746	CON	1	0.0380355
G2	24.9454	20.85	4.0954	0.134249	0.911144					MUT	0.902604	0.048293
G3	24.8951	20.8794	4.01573	0.0545807	0.962874
G4	24.8762	20.7949	4.08128	0.120125	0.920108	0.864701	0.046265	0.0566628
G5	24.9587	20.7919	4.16683	0.205675	0.867133
G6	24.9545	20.6837	4.27076	0.309608	0.806861
			0								Normalize
Id1			0								Average	STE
G7	24.9132	20.9705	3.94272	0	1	0.956805	0.0306669	0.0375591	0.176585	CON	1	0.0320513
G8	24.8842	20.85	4.03417	0.0914516	0.938578					MUT	0.932071	0.0560218
G9	24.9239	20.8794	4.04457	0.101849	0.931838
G10	24.846	20.7949	4.05109	0.108368	0.927637	0.89181	0.053602	0.0656487
G11	24.8366	20.7919	4.0447	0.101984	0.931751
G12	24.9197	20.6837	4.236	0.293283	0.816043
			0								Normalize
Sema5a			0								Average	STE
H1	23.84	20.9705	2.86952	0	1	0.939448	0.0477322	0.0584598	0.982907	CON	1	0.0508088
H2	23.8165	20.85	2.96647	0.0969429	0.935012					MUT	1.00105	0.0117832
H3	23.9279	20.8794	3.04849	0.17897	0.883333
H4	23.7772	20.7949	2.98233	0.112803	0.92479	0.940435	0.0110697	0.0135575
H5	23.7373	20.7919	2.94545	0.0759296	0.948731
H6	23.6306	20.6837	2.94689	0.0773678	0.947785
			0								Normalize
Id3			0								Average	STE
H7	23.8084	20.9705	2.8379	0	1	0.935486	0.051292	0.0628196	0.502654	CON	1	0.0548292
H8	23.7896	20.85	2.93957	0.101677	0.931949					MUT	0.955927	0.0645654
H9	23.9107	20.8794	3.03135	0.193453	0.87451
H10	23.7339	20.7949	2.93902	0.101126	0.932305	0.894257	0.0604	0.0739746
H11	23.7168	20.7919	2.92492	0.0870228	0.941464
H12	23.8274	20.6837	3.14368	0.305784	0.809002
