# Supplementary material for: The differentiation and integration of the hippocampal dorsoventral axis are controlled by two nuclear receptor genes
Source: eLife journal article supplement (doi:10.7554/elife.86940), 2023-05-10
Supplement: fig5-data3 [file ke20110629-2_data.xls]

## Sheet: Results
Block Type	96well
Chemistry	TAQMAN
Experiment File Name	D:\Applied Biosystems\StepOne Software v2.1\experiments\KE\ke20110629-2.eds
Experiment Run End Time	2011-06-29 18:38:12 PM CDT
Instrument Type	steponeplus
Passive Reference	ROX
Well	Sample Name	Target Name	Task	Reporter	Quencher	Cт	Cт Mean	Cт SD	Quantity	Quantity Mean	Quantity SD	Automatic Ct Threshold	Ct Threshold	Automatic Baseline	Baseline Start	Baseline End	Comments	HIGHSD	NOAMP	EXPFAIL
A1	Sample 1	Target 1	UNKNOWN	FAM	NFQ-MGB	Undetermined						TRUE	0.00416419	TRUE	3	39		N	Y	Y
A2	Sample 1	Target 1	UNKNOWN	FAM	NFQ-MGB	Undetermined						TRUE	0.00416419	TRUE	3	39		N	Y	Y
A3	Sample 1	Target 1	UNKNOWN	FAM	NFQ-MGB	Undetermined						TRUE	0.00416419	TRUE	3	39		N	Y	Y
A4	Sample 2	Target 1	UNKNOWN	FAM	NFQ-MGB	37.3309	37.0391	0.412764				TRUE	0.00416419	TRUE	3	35		N	Y	N
A5	Sample 2	Target 1	UNKNOWN	FAM	NFQ-MGB	36.7472	37.0391	0.412764				TRUE	0.00416419	TRUE	3	35		N	N	N
A6	Sample 2	Target 1	UNKNOWN	FAM	NFQ-MGB	Undetermined	37.0391	0.412764				TRUE	0.00416419	TRUE	3	39		N	Y	Y
A7	Sample 3	Target 9	UNKNOWN	VIC	NFQ-MGB	20.9429	20.8947	0.121047				TRUE	0.211148	TRUE	3	15		N	N	N
A8	Sample 3	Target 9	UNKNOWN	VIC	NFQ-MGB	20.9842	20.8947	0.121047				TRUE	0.211148	TRUE	3	15		N	N	N
A9	Sample 3	Target 9	UNKNOWN	VIC	NFQ-MGB	20.7569	20.8947	0.121047				TRUE	0.211148	TRUE	3	15		N	N	N
A10	Sample 4	Target 9	UNKNOWN	VIC	NFQ-MGB	20.7326	20.8124	0.124978				TRUE	0.211148	TRUE	3	15		N	N	N
A11	Sample 4	Target 9	UNKNOWN	VIC	NFQ-MGB	20.7483	20.8124	0.124978				TRUE	0.211148	TRUE	3	15		N	N	N
A12	Sample 4	Target 9	UNKNOWN	VIC	NFQ-MGB	20.9565	20.8124	0.124978				TRUE	0.211148	TRUE	3	15		N	N	N
B1	Sample 1	Target 2	UNKNOWN	FAM	NFQ-MGB	26.9734	26.9138	0.0756807				TRUE	0.223226	TRUE	3	21		N	N	N
B2	Sample 1	Target 2	UNKNOWN	FAM	NFQ-MGB	26.9394	26.9138	0.0756807				TRUE	0.223226	TRUE	3	21		N	N	N
B3	Sample 1	Target 2	UNKNOWN	FAM	NFQ-MGB	26.8286	26.9138	0.0756807				TRUE	0.223226	TRUE	3	21		N	N	N
B4	Sample 2	Target 2	UNKNOWN	FAM	NFQ-MGB	26.9604	26.9623	0.00992793				TRUE	0.223226	TRUE	3	21		N	N	N
B5	Sample 2	Target 2	UNKNOWN	FAM	NFQ-MGB	26.973	26.9623	0.00992793				TRUE	0.223226	TRUE	3	21		N	N	N
B6	Sample 2	Target 2	UNKNOWN	FAM	NFQ-MGB	26.9534	26.9623	0.00992793				TRUE	0.223226	TRUE	3	21		N	N	N
B7	Sample 3	Target 10	UNKNOWN	FAM	NFQ-MGB	20.9644	20.9643	0.00870298				TRUE	0.186891	TRUE	3	16		N	N	N
B8	Sample 3	Target 10	UNKNOWN	FAM	NFQ-MGB	20.9729	20.9643	0.00870298				TRUE	0.186891	TRUE	3	16		N	N	N
B9	Sample 3	Target 10	UNKNOWN	FAM	NFQ-MGB	20.9555	20.9643	0.00870298				TRUE	0.186891	TRUE	3	16		N	N	N
B10	Sample 4	Target 10	UNKNOWN	FAM	NFQ-MGB	21.0689	21.0943	0.0311002				TRUE	0.186891	TRUE	3	16		N	N	N
B11	Sample 4	Target 10	UNKNOWN	FAM	NFQ-MGB	21.0849	21.0943	0.0311002				TRUE	0.186891	TRUE	3	16		N	N	N
B12	Sample 4	Target 10	UNKNOWN	FAM	NFQ-MGB	21.129	21.0943	0.0311002				TRUE	0.186891	TRUE	3	16		N	N	N
C1	Sample 1	Target 3	UNKNOWN	FAM	NFQ-MGB	29.2218	29.1297	0.0963479				TRUE	0.0527018	TRUE	3	26		N	N	N
C2	Sample 1	Target 3	UNKNOWN	FAM	NFQ-MGB	29.0296	29.1297	0.0963479				TRUE	0.0527018	TRUE	3	26		N	N	N
C3	Sample 1	Target 3	UNKNOWN	FAM	NFQ-MGB	29.1375	29.1297	0.0963479				TRUE	0.0527018	TRUE	3	26		N	N	N
C4	Sample 2	Target 3	UNKNOWN	FAM	NFQ-MGB	29.0717	28.998	0.0651386				TRUE	0.0527018	TRUE	3	25		N	N	N
C5	Sample 2	Target 3	UNKNOWN	FAM	NFQ-MGB	28.9482	28.998	0.0651386				TRUE	0.0527018	TRUE	3	26		N	N	N
C6	Sample 2	Target 3	UNKNOWN	FAM	NFQ-MGB	28.974	28.998	0.0651386				TRUE	0.0527018	TRUE	3	26		N	N	N
C7	Sample 3	Target 11	UNKNOWN	FAM	NFQ-MGB	27.9909	27.9426	0.0729354				TRUE	0.48969	TRUE	3	21		N	N	N
C8	Sample 3	Target 11	UNKNOWN	FAM	NFQ-MGB	27.9782	27.9426	0.0729354				TRUE	0.48969	TRUE	3	21		N	N	N
C9	Sample 3	Target 11	UNKNOWN	FAM	NFQ-MGB	27.8587	27.9426	0.0729354				TRUE	0.48969	TRUE	3	21		N	N	N
C10	Sample 4	Target 11	UNKNOWN	FAM	NFQ-MGB	28.8138	28.8247	0.0479552				TRUE	0.48969	TRUE	3	22		N	N	N
C11	Sample 4	Target 11	UNKNOWN	FAM	NFQ-MGB	28.7831	28.8247	0.0479552				TRUE	0.48969	TRUE	3	22		N	N	N
C12	Sample 4	Target 11	UNKNOWN	FAM	NFQ-MGB	28.8772	28.8247	0.0479552				TRUE	0.48969	TRUE	3	22		N	N	N
D1	Sample 1	Target 4	UNKNOWN	FAM	NFQ-MGB	27.6369	27.5898	0.0427277				TRUE	0.219502	TRUE	3	22		N	N	N
D2	Sample 1	Target 4	UNKNOWN	FAM	NFQ-MGB	27.5536	27.5898	0.0427277				TRUE	0.219502	TRUE	3	22		N	N	N
D3	Sample 1	Target 4	UNKNOWN	FAM	NFQ-MGB	27.5787	27.5898	0.0427277				TRUE	0.219502	TRUE	3	22		N	N	N
D4	Sample 2	Target 4	UNKNOWN	FAM	NFQ-MGB	27.9537	27.9513	0.0105617				TRUE	0.219502	TRUE	3	22		N	N	N
D5	Sample 2	Target 4	UNKNOWN	FAM	NFQ-MGB	27.9605	27.9513	0.0105617				TRUE	0.219502	TRUE	3	22		N	N	N
D6	Sample 2	Target 4	UNKNOWN	FAM	NFQ-MGB	27.9398	27.9513	0.0105617				TRUE	0.219502	TRUE	3	22		N	N	N
D7	Sample 3	Target 12	UNKNOWN	FAM	NFQ-MGB	27.8988	27.901	0.0506499				TRUE	0.740695	TRUE	3	21		N	N	N
D8	Sample 3	Target 12	UNKNOWN	FAM	NFQ-MGB	27.8515	27.901	0.0506499				TRUE	0.740695	TRUE	3	21		N	N	N
D9	Sample 3	Target 12	UNKNOWN	FAM	NFQ-MGB	27.9527	27.901	0.0506499				TRUE	0.740695	TRUE	3	21		N	N	N
D10	Sample 4	Target 12	UNKNOWN	FAM	NFQ-MGB	28.8589	28.8879	0.0719565				TRUE	0.740695	TRUE	3	22		N	N	N
D11	Sample 4	Target 12	UNKNOWN	FAM	NFQ-MGB	28.835	28.8879	0.0719565				TRUE	0.740695	TRUE	3	22		N	N	N
D12	Sample 4	Target 12	UNKNOWN	FAM	NFQ-MGB	28.9698	28.8879	0.0719565				TRUE	0.740695	TRUE	3	22		N	N	N
E1	Sample 1	Target 5	UNKNOWN	FAM	NFQ-MGB	24.8932	24.9128	0.0269497				TRUE	0.0471257	TRUE	3	22		N	N	N
E2	Sample 1	Target 5	UNKNOWN	FAM	NFQ-MGB	24.9018	24.9128	0.0269497				TRUE	0.0471257	TRUE	3	22		N	N	N
E3	Sample 1	Target 5	UNKNOWN	FAM	NFQ-MGB	24.9436	24.9128	0.0269497				TRUE	0.0471257	TRUE	3	22		N	N	N
E4	Sample 2	Target 5	UNKNOWN	FAM	NFQ-MGB	24.9765	24.9285	0.0423627				TRUE	0.0471257	TRUE	3	22		N	N	N
E5	Sample 2	Target 5	UNKNOWN	FAM	NFQ-MGB	24.8962	24.9285	0.0423627				TRUE	0.0471257	TRUE	3	22		N	N	N
E6	Sample 2	Target 5	UNKNOWN	FAM	NFQ-MGB	24.9128	24.9285	0.0423627				TRUE	0.0471257	TRUE	3	22		N	N	N
E7	Sample 3	Target 13	UNKNOWN	FAM	NFQ-MGB	25.9143	25.9401	0.0340562				TRUE	0.489112	TRUE	3	19		N	N	N
E8	Sample 3	Target 13	UNKNOWN	FAM	NFQ-MGB	25.9273	25.9401	0.0340562				TRUE	0.489112	TRUE	3	19		N	N	N
E9	Sample 3	Target 13	UNKNOWN	FAM	NFQ-MGB	25.9787	25.9401	0.0340562				TRUE	0.489112	TRUE	3	19		N	N	N
E10	Sample 4	Target 13	UNKNOWN	FAM	NFQ-MGB	25.8665	25.8446	0.0318809				TRUE	0.489112	TRUE	3	19		N	N	N
E11	Sample 4	Target 13	UNKNOWN	FAM	NFQ-MGB	25.8593	25.8446	0.0318809				TRUE	0.489112	TRUE	3	19		N	N	N
E12	Sample 4	Target 13	UNKNOWN	FAM	NFQ-MGB	25.808	25.8446	0.0318809				TRUE	0.489112	TRUE	3	19		N	N	N
F1	Sample 1	Target 6	UNKNOWN	FAM	NFQ-MGB	28.4521	28.4871	0.0723184				TRUE	0.35802	TRUE	3	22		N	N	N
F2	Sample 1	Target 6	UNKNOWN	FAM	NFQ-MGB	28.4389	28.4871	0.0723184				TRUE	0.35802	TRUE	3	22		N	N	N
F3	Sample 1	Target 6	UNKNOWN	FAM	NFQ-MGB	28.5703	28.4871	0.0723184				TRUE	0.35802	TRUE	3	22		N	N	N
F4	Sample 2	Target 6	UNKNOWN	FAM	NFQ-MGB	28.9817	28.9278	0.0467596				TRUE	0.35802	TRUE	3	23		N	N	N
F5	Sample 2	Target 6	UNKNOWN	FAM	NFQ-MGB	28.8983	28.9278	0.0467596				TRUE	0.35802	TRUE	3	23		N	N	N
F6	Sample 2	Target 6	UNKNOWN	FAM	NFQ-MGB	28.9034	28.9278	0.0467596				TRUE	0.35802	TRUE	3	23		N	N	N
F7	Sample 3	Target 14	UNKNOWN	FAM	NFQ-MGB	23.9479	23.9397	0.00716274				TRUE	0.3706	TRUE	3	18		N	N	N
F8	Sample 3	Target 14	UNKNOWN	FAM	NFQ-MGB	23.9357	23.9397	0.00716274				TRUE	0.3706	TRUE	3	18		N	N	N
F9	Sample 3	Target 14	UNKNOWN	FAM	NFQ-MGB	23.9354	23.9397	0.00716274				TRUE	0.3706	TRUE	3	18		N	N	N
F10	Sample 4	Target 14	UNKNOWN	FAM	NFQ-MGB	24.0848	24.0655	0.0590981				TRUE	0.3706	TRUE	3	18		N	N	N
F11	Sample 4	Target 14	UNKNOWN	FAM	NFQ-MGB	23.9992	24.0655	0.0590981				TRUE	0.3706	TRUE	3	18		N	N	N
F12	Sample 4	Target 14	UNKNOWN	FAM	NFQ-MGB	24.1125	24.0655	0.0590981				TRUE	0.3706	TRUE	3	18		N	N	N
G1	Sample 1	Target 7	UNKNOWN	FAM	NFQ-MGB	35.9643	35.7855	0.15604				TRUE	0.227522	TRUE	3	31		N	N	N
G2	Sample 1	Target 7	UNKNOWN	FAM	NFQ-MGB	35.7156	35.7855	0.15604				TRUE	0.227522	TRUE	3	30		N	N	N
G3	Sample 1	Target 7	UNKNOWN	FAM	NFQ-MGB	35.6767	35.7855	0.15604				TRUE	0.227522	TRUE	3	30		N	N	N
G4	Sample 2	Target 7	UNKNOWN	FAM	NFQ-MGB	35.3881	35.4852	0.0883717				TRUE	0.227522	TRUE	3	30		N	N	N
G5	Sample 2	Target 7	UNKNOWN	FAM	NFQ-MGB	35.5609	35.4852	0.0883717				TRUE	0.227522	TRUE	3	30		N	N	N
G6	Sample 2	Target 7	UNKNOWN	FAM	NFQ-MGB	35.5066	35.4852	0.0883717				TRUE	0.227522	TRUE	3	30		N	N	N
G7	Sample 3	Target 15	UNKNOWN	FAM	NFQ-MGB	36.7407	36.8435	0.111817				TRUE	0.1087	TRUE	3	33		N	N	N
G8	Sample 3	Target 15	UNKNOWN	FAM	NFQ-MGB	36.9626	36.8435	0.111817				TRUE	0.1087	TRUE	3	33		N	N	N
G9	Sample 3	Target 15	UNKNOWN	FAM	NFQ-MGB	36.8273	36.8435	0.111817				TRUE	0.1087	TRUE	3	33		N	N	N
G10	Sample 4	Target 15	UNKNOWN	FAM	NFQ-MGB	35.1937	35.3052	0.109392				TRUE	0.1087	TRUE	3	31		N	N	N
G11	Sample 4	Target 15	UNKNOWN	FAM	NFQ-MGB	35.3098	35.3052	0.109392				TRUE	0.1087	TRUE	3	31		N	N	N
G12	Sample 4	Target 15	UNKNOWN	FAM	NFQ-MGB	35.4123	35.3052	0.109392				TRUE	0.1087	TRUE	3	31		N	N	N
H1	Sample 1	Target 8	UNKNOWN	FAM	NFQ-MGB	35.3017	34.2926	0.876023				TRUE	0.0949279	TRUE	3	31		Y	N	N
H2	Sample 1	Target 8	UNKNOWN	FAM	NFQ-MGB	33.849	34.2926	0.876023				TRUE	0.0949279	TRUE	3	30		Y	N	N
H3	Sample 1	Target 8	UNKNOWN	FAM	NFQ-MGB	33.727	34.2926	0.876023				TRUE	0.0949279	TRUE	3	30		Y	N	N
H4	Sample 2	Target 8	UNKNOWN	FAM	NFQ-MGB	37.0366	36.8463	0.214647				TRUE	0.0949279	TRUE	3	33		N	N	N
H5	Sample 2	Target 8	UNKNOWN	FAM	NFQ-MGB	36.6137	36.8463	0.214647				TRUE	0.0949279	TRUE	3	33		N	N	N
H6	Sample 2	Target 8	UNKNOWN	FAM	NFQ-MGB	36.8887	36.8463	0.214647				TRUE	0.0949279	TRUE	3	33		N	N	N
H7	Sample 3	Target 16	UNKNOWN	FAM	NFQ-MGB	30.8343	30.8744	0.0867979				TRUE	0.449948	TRUE	3	24		N	N	N
H8	Sample 3	Target 16	UNKNOWN	FAM	NFQ-MGB	30.8149	30.8744	0.0867979				TRUE	0.449948	TRUE	3	24		N	N	N
H9	Sample 3	Target 16	UNKNOWN	FAM	NFQ-MGB	30.974	30.8744	0.0867979				TRUE	0.449948	TRUE	3	24		N	N	N
H10	Sample 4	Target 16	UNKNOWN	FAM	NFQ-MGB	32.5795	32.6409	0.0561572				TRUE	0.449948	TRUE	3	26		N	N	N
H11	Sample 4	Target 16	UNKNOWN	FAM	NFQ-MGB	32.6537	32.6409	0.0561572				TRUE	0.449948	TRUE	3	26		N	N	N
H12	Sample 4	Target 16	UNKNOWN	FAM	NFQ-MGB	32.6896	32.6409	0.0561572				TRUE	0.449948	TRUE	3	26		N	N	N

## Sheet: PPIA
Pard3a	Brain E11.5
Well	Cт	PPIA	dCt	ddCt	2^(-ddCt)	Average	STE	STD	Ttest (2,2)
A1	Undetermined	20.9705	#VALUE!	#VALUE!	#VALUE!	#VALUE!	#VALUE!	#VALUE!	#VALUE!	CON	#VALUE!	#VALUE!
A2	Undetermined	20.85	#VALUE!	#VALUE!	#VALUE!					MUT	#VALUE!	#VALUE!
A3	Undetermined	20.8794	#VALUE!	#VALUE!	#VALUE!
A4	37.3309	20.7949	16.536	#VALUE!	#VALUE!	#VALUE!	#VALUE!	#VALUE!
A5	36.7472	20.7919	15.9553	#VALUE!	#VALUE!
A6	Undetermined	20.6837	#VALUE!	#VALUE!	#VALUE!
18S	EYE E14.5
A7	20.9429	20.9644	-0.0215034	0	1	1.03604	0.0674719	0.0826359	0.0665131	CON	1	0.0651251
A8	20.9842	20.9729	0.0112743	0.0327778	0.977536					MUT	1.15775	0.0608194
A9	20.7569	20.9555	-0.198553	-0.17705	1.13057
A10	20.7326	21.0689	-0.336342	-0.314838	1.24387	1.19947	0.063011	0.0771724
A11	20.7483	21.0849	-0.336689	-0.315186	1.24417
A12	20.9565	21.129	-0.172525	-0.151022	1.11036
Siah1
B1	26.9734	20.9705	6.00291	0	1	0.993241	0.0394904	0.0483656	0.0219089	CON	1	0.0397591
B2	26.9394	20.85	6.08934	0.0864296	0.941851					MUT	0.87539	0.0275568
B3	26.8286	20.8794	5.94928	-0.053627	1.03787
B4	26.9604	20.7949	6.16546	0.162554	0.893442	0.869473	0.0273706	0.033522
B5	26.973	20.7919	6.1811	0.178192	0.88381
B6	26.9534	20.6837	6.2697	0.26679	0.831167
PPIA
B7	20.9644	20.9644	0	0	1	1	0	0	#DIV/0!	CON	1	0
B8	20.9729	20.9729	0	0	1					MUT	1	0
B9	20.9555	20.9555	0	0	1
B10	21.0689	21.0689	0	0	1	1	0	0
B11	21.0849	21.0849	0	0	1
B12	21.129	21.129	0	0	1
Siah2
C1	29.2218	20.9705	8.25135	0	1	1.01543	0.0252382	0.0309104	0.842468	CON	1	0.0248546
C2	29.0296	20.85	8.17956	-0.0717926	1.05102					MUT	0.992682	0.0420186
C3	29.1375	20.8794	8.25818	0.0068264	0.995279
C4	29.0717	20.7949	8.27678	0.025423	0.982532	1.008	0.0426671	0.0522563
C5	28.9482	20.7919	8.15629	-0.0950603	1.06811
C6	28.974	20.6837	8.2903	0.0389481	0.973364
CI
C7	27.9909	20.9644	7.0265	0	1	1.03469	0.0390432	0.0478179	0.000121866	CON	1	0.0377341
C8	27.9782	20.9729	7.00525	-0.0212517	1.01484					MUT	0.593402	0.00943267
C9	27.8587	20.9555	6.90318	-0.123322	1.08924
C10	28.8138	21.0689	7.74482	0.718319	0.607805	0.613989	0.00975992	0.0119534
C11	28.7831	21.0849	7.6982	0.671698	0.627768
C12	28.8772	21.129	7.74818	0.721672	0.606394
Siah3
D1	27.6369	20.9705	6.66645	0	1	0.984015	0.0113634	0.0139173	6.53035e-05	CON	1	0.011548
D2	27.5536	20.85	6.70358	0.0371284	0.974593					MUT	0.705082	0.0211401
D3	27.5787	20.8794	6.69936	0.0329037	0.977451
D4	27.9537	20.7949	7.15884	0.492386	0.710849	0.693811	0.0208022	0.0254774
D5	27.9605	20.7919	7.16859	0.502134	0.706061
D6	27.9398	20.6837	7.25606	0.589611	0.664522
CII
D7	27.8988	20.9644	6.93436	0	1	0.998938	0.0335059	0.0410362	6.41008e-05	CON	1	0.0335415
D8	27.8515	20.9729	6.87856	-0.0557957	1.03943					MUT	0.552011	0.0141904
D9	27.9527	20.9555	6.99719	0.0628357	0.95738
D10	28.8589	21.0689	7.78994	0.855587	0.55264	0.551424	0.0141753	0.0173612
D11	28.835	21.0849	7.75002	0.815668	0.568145
D12	28.9698	21.129	7.84083	0.906475	0.533487
NeuroD
E1	24.8932	20.9705	3.92271	0	1	0.940343	0.0423055	0.0518135	0.0554544	CON	1	0.0449895
E2	24.9018	20.85	4.05174	0.12903	0.914446					MUT	0.89546	0.0320635
E3	24.9436	20.8794	4.0642	0.141487	0.906584
E4	24.9765	20.7949	4.18157	0.25886	0.835748	0.842039	0.0301507	0.036927
E5	24.8962	20.7919	4.10434	0.181627	0.881708
E6	24.9128	20.6837	4.2291	0.306391	0.808662
Pax6
E7	25.9143	20.9644	4.94991	0	1	0.982464	0.0226565	0.0277485	0.00746138	CON	1	0.0230609
E8	25.9273	20.9729	4.95436	0.00445175	0.996919					MUT	1.16962	0.0420098
E9	25.9787	20.9555	5.0232	0.0732841	0.950472
E10	25.8665	21.0689	4.7976	-0.152317	1.11135	1.14911	0.0412731	0.0505491
E11	25.8593	21.0849	4.77431	-0.175606	1.12944
E12	25.808	21.129	4.67904	-0.270872	1.20654
Fgfr1
F1	28.4521	20.9705	7.48166	0	1	0.931126	0.0551492	0.0675437	0.00172436	CON	1	0.0592285
F2	28.4389	20.85	7.58887	0.10721	0.928382					MUT	0.666405	0.0221383
F3	28.5703	20.8794	7.6909	0.209234	0.864996
F4	28.9817	20.7949	8.18678	0.705112	0.613395	0.620507	0.0206135	0.0252463
F5	28.8983	20.7919	8.10638	0.624718	0.648547
F6	28.9034	20.6837	8.21964	0.737976	0.59958
Fgf15
F7	23.9479	20.9644	2.98353	0	1	1.00568	0.00632046	0.00774096	0.884726	CON	1	0.00628477
F8	23.9357	20.9729	2.96277	-0.0207634	1.0145					MUT	1.00331	0.029668
F9	23.9354	20.9555	2.97987	-0.0036602	1.00254
F10	24.0848	21.0689	3.0159	0.0323658	0.977816	1.00901	0.0298365	0.0365421
F11	23.9992	21.0849	2.91422	-0.0693092	1.04921
F12	24.1125	21.129	2.98353	0	1
Vax1
G1	35.9643	20.9705	14.9938	0	1	1.07964	0.0603162	0.0738719	0.160405	CON	1	0.0558669
G2	35.7156	20.85	14.8655	-0.128296	1.093					MUT	1.11595	0.077202
G3	35.6767	20.8794	14.7973	-0.196507	1.14592
G4	35.3881	20.7949	14.5932	-0.400627	1.32008	1.20483	0.0833504	0.102083
G5	35.5609	20.7919	14.769	-0.224796	1.16861
G6	35.5066	20.6837	14.8229	-0.170938	1.12579
Vax1
G7	36.7407	20.9644	15.7763	0	1	0.932832	0.0561643	0.068787	4.00536e-05	CON	1	0.0602084
G8	36.9626	20.9729	15.9897	0.213348	0.862533					MUT	3.17592	0.145097
G9	36.8273	20.9555	15.8718	0.0954762	0.935963
G10	35.1937	21.0689	14.1247	-1.6516	3.14181	2.9626	0.135351	0.165771
G11	35.3098	21.0849	14.2248	-1.5515	2.93121
G12	35.4123	21.129	14.2833	-1.49301	2.81476
Vax2
H1	35.3017	20.9705	14.3312	0	1	1.05529	0.0552887	0.07819	0.000223457	CON	1	0.052392
H2	33.849	20.85	12.999	0	1					MUT	0.112242	0.0153731
H3	33.727	20.8794	12.8477	-0.15131	1.11058
H4	37.0366	20.7949	16.2417	3.24275	0.105642	0.118448	0.016223	0.0198691
H5	36.6137	20.7919	15.8218	2.82279	0.141337
H6	36.8887	20.6837	16.205	3.20602	0.108366
Vax2	eye E14.5
H7	30.8343	20.9644	9.86988	0	1	0.973898	0.0513639	0.0629076	5.48635e-05	CON	1	0.0527405
H8	30.8149	20.9729	9.84195	-0.0279369	1.01955					MUT	0.321225	0.00576344
H9	30.974	20.9555	10.0185	0.148575	0.902141
H10	32.5795	21.0689	11.5105	1.64064	0.320714	0.312841	0.00561301	0.0068745
H11	32.6537	21.0849	11.5687	1.69886	0.30803
H12	32.6896	21.129	11.5606	1.69069	0.309778
