# Supplementary material for: The differentiation and integration of the hippocampal dorsoventral axis are controlled by two nuclear receptor genes
Source: eLife journal article supplement (doi:10.7554/elife.86940), 2023-05-10
Supplement: fig5-data3 [file NeuroD1(E14.5).xlsx]

## Sheet: Sheet1
	E14.5
	NeuroD1+	CON	DKO
		135	80
		140	90
		125	78
